# Supplementary material for: Omilancor mitigates the senescence of nucleus pulposus cells induced by DDP through targeting MAP2K6
Source: publisher site journal article supplement (doi:10.18632/aging.205588), 2024-03-20
Supplement: Supplementary file [file aging-v16i6-205588-supplementary-material-SD1.pdf]

**SUPPLEMENTARY FIGURE**

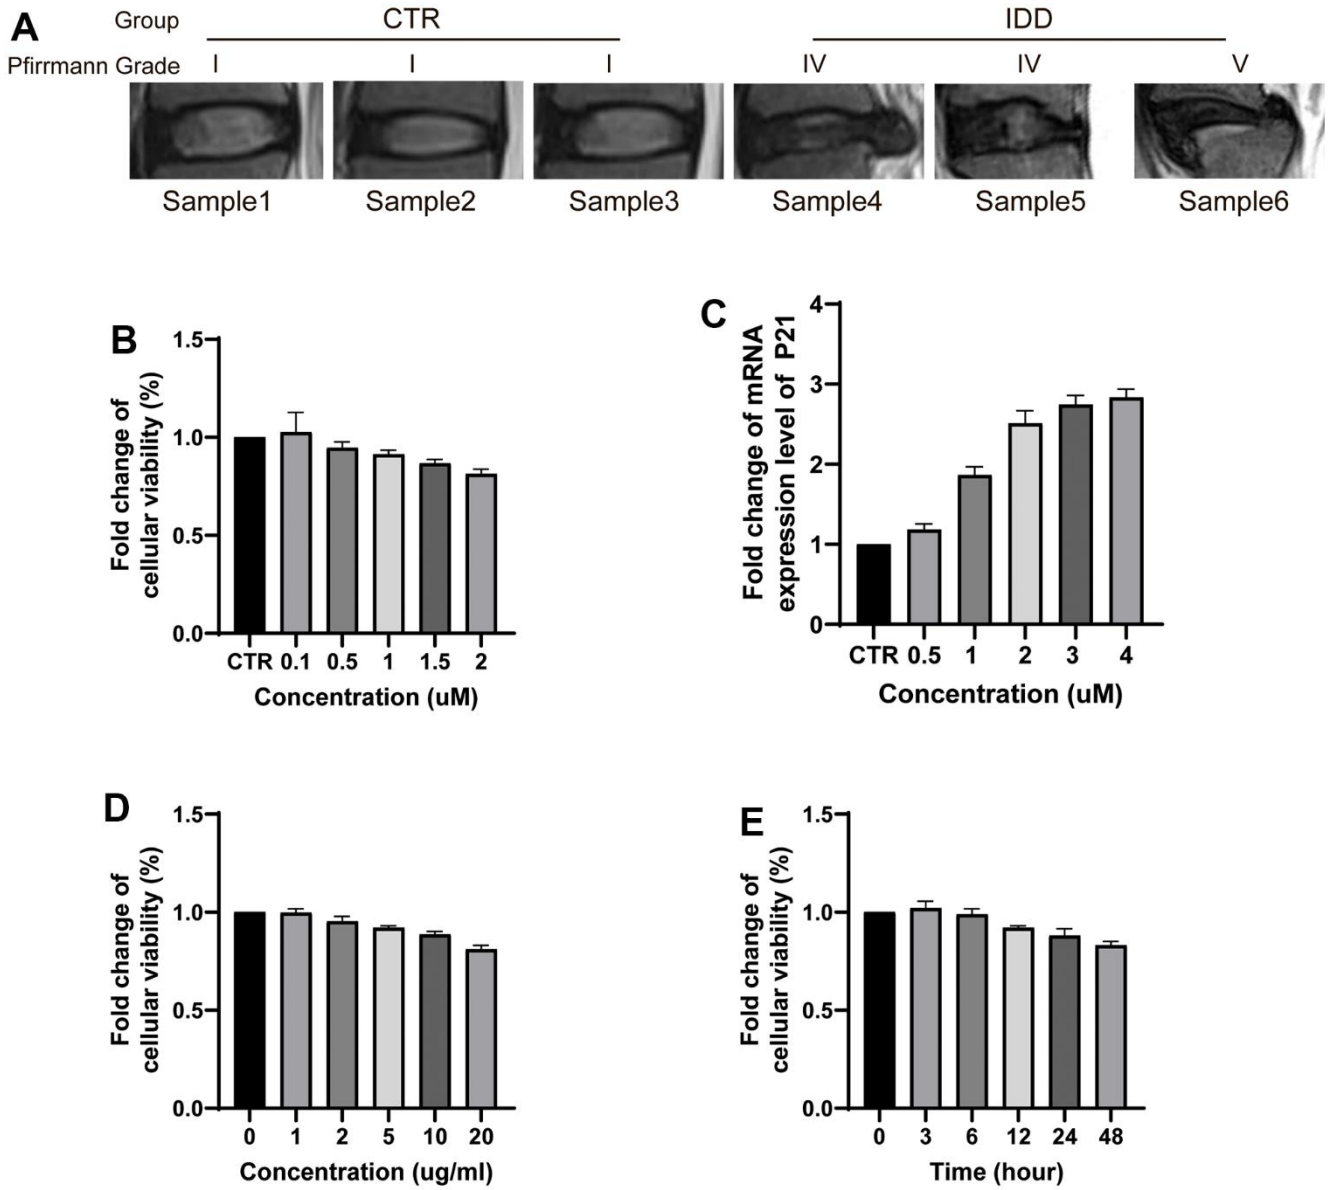

**Supplementary Figure 1. Representative T2 image of human IVDs, concentration and time screening of DDP and Omiclancor.** (A) Representative T2 image of human IVDs in different Pfirrmann grade. (B) CCK8 of DDP treatment on NPCs with different concentration. (C) RT-qPCR of P21 expression with different concentration of DDP treatment on NPCs. (D, E) CCK8 of Omiclancor treatment on NPCs with different concentration and time. CTR, control group; IDD, intervertebral disc degeneration group. n = 3 each group. Data are represented as mean ± standard deviation.
