# Supplementary material for: Omilancor mitigates the senescence of nucleus pulposus cells induced by DDP through targeting MAP2K6
Source: Aging (Albany NY). 2024 Mar 20;16(6):5050–64. doi: 10.18632/aging.205588 (PMC11006466; doi:10.18632/aging.205588)
Supplement: Supplementary Table 1 [file aging-16-205588-s002.xlsx]

## Sheet: supplement 2
Supplementary Table 1. Information of GEO expression datasets.
Protein	PDB ID	Ligand(Pubchem cid)	energy		name
MAP2K6	3VN9	121299620	-12.1		Methanone, 1,1'-(1,4-piperazinediyl)bis(1-(6-(1H-benzimidazol-2-yl)-2-pyridinyl)-
MAP2K6	3VN9	51049968	-11.8		Rimegepant
MAP2K6	3VN9	73292904	-11.5		Deltarasin
MAP2K6	3VN9	46215462	-11.4		Bemcentinib
MAP2K6	3VN9	222757	-11.3		Estradiol benzoate
MAP2K6	3VN9	89670174	-11.3		Beigene-283
MAP2K6	3VN9	72402	-11.2		9-Aminocamptothecin
MAP2K6	3VN9	11960271	-11.1		2-(5-fluoro-2-methyl-1H-indol-3-yl)-1H-imidazo[4,5-f][1,10]phenanthroline
MAP2K6	3VN9	1383822	-11		2-Benzo[1,3]dioxol-5-yl-N-{5-methyl-4-[1-(2-methyl-benzoyl)-2,3-dihydro-1H-indol-5-yl]-thiazol-2-yl}-acetamide
MAP2K6	3VN9	46843906	-11		Lrrk2-IN-1
MAP2K6	3VN9	5282164	-11		gamma-Oryzanol
MAP2K6	3VN9	67324851	-11		N-(2-Methyl-2-(2-phenyloxazol-4-yl)propyl)-3-(5-(trifluoromethyl)-1,2,4-oxadiazol-3-yl)benzamide
MAP2K6	3VN9	72836888	-11		Ddr1-IN-1
MAP2K6	3VN9	9910474	-11		Neoruscogenin
MAP2K6	3VN9	104842	-10.9		7-Ethyl-10-hydroxycamptothecin
MAP2K6	3VN9	11285002	-10.9		RGB-286638 free base
MAP2K6	3VN9	11296583	-10.9		Pirarubicin
MAP2K6	3VN9	122508151	-10.9		Tbopp
MAP2K6	3VN9	23725625	-10.9		Olaparib
MAP2K6	3VN9	25154249	-10.9		Afoxolaner
MAP2K6	3VN9	53380437	-10.9		Itacitinib
MAP2K6	3VN9	56649297	-10.9		Fluzoparib
MAP2K6	3VN9	59215954	-10.9		Vorolanib
MAP2K6	3VN9	6918296	-10.9		Dutasteride
MAP2K6	3VN9	90645873	-10.9		Tamnorzatinib
MAP2K6	3VN9	11676786	-10.8		3-(2-Cyanopropan-2-yl)-N-(4-methyl-3-((3-methyl-4-oxo-3,4-dihydroquinazolin-6-yl)amino)phenyl)benzamide
MAP2K6	3VN9	127584	-10.8		7-Ethylcamptothecin
MAP2K6	3VN9	139600318	-10.8		(20R)-10,15,20-trimethyl-2-[(4-methylpiperazin-1-yl)methyl]-18,19,20,21-tetrahydro-15H,17H-12,8-(metheno)pyrazolo[3',4':2,3][1,5,10,12]oxatriazacycloheptadecino[12,11-a]benzimidazol-7(6H)-one
MAP2K6	3VN9	4330531	-10.8		(+/-)-10-Hydroxycamptothecin
MAP2K6	3VN9	45256689	-10.8		CID 45256689
MAP2K6	3VN9	46848036	-10.8		Flumatinib
MAP2K6	3VN9	46861623	-10.8		Alvelestat
MAP2K6	3VN9	472335	-10.8		Rubitecan
MAP2K6	3VN9	71604307	-10.8		11-Cyclopentyl-2-[2-ethoxy-4-[4-(4-methylpiperazin-1-yl)piperidine-1-carbonyl]anilino]-5-methylpyrimido[4,5-b][1,4]benzodiazepin-6-one
MAP2K6	3VN9	91667931	-10.8		4-Methyl-1-(1h-Pyrazol-4-Ylmethyl)-5-[(4-{[6-(2,2,2-Trifluoroethyl)thieno[2,3-D]pyrimidin-4-Yl]amino}piperidin-1-Yl)methyl]-1h-Indole-2-Carbonitrile
MAP2K6	3VN9	97226	-10.8		10-Hydroxycamptothecin
MAP2K6	3VN9	134817273	-10.7		N2-(4-(1H-benzo[d]imidazol-2-yl)phenyl)-N4-(4-fluorophenyl)-6-morpholino-1,3,5-triazine-2,4-diamine
MAP2K6	3VN9	139512018	-10.7		Migoprotafib
MAP2K6	3VN9	16222379	-10.7		5-(3,3-Difluorocyclobutyl)-3-[4-[4-methyl-5-[2-(trifluoromethyl)phenyl]-4H-1,2,4-triazol-3-yl]bicyclo[2.2.2]oct-1-yl]-1,2,4-oxadiazole
MAP2K6	3VN9	441893	-10.7		Ruscogenin
MAP2K6	3VN9	44483163	-10.7		IWR-1-endo
MAP2K6	3VN9	46194178	-10.7		1-(4-fluorophenyl)-N-[3-fluoro-4-[(3-phenyl-1H-pyrrolo[2,3-b]pyridin-4-yl)oxy]phenyl]-2,3-dimethyl-5-oxopyrazole-4-carboxamide
MAP2K6	3VN9	51039094	-10.7		Tucatinib
MAP2K6	3VN9	5154	-10.7		Sanguinarium
MAP2K6	3VN9	91610	-10.7		Gliquidone
MAP2K6	3VN9	10098	-10.6		Jervine
MAP2K6	3VN9	11485656	-10.6		Linifanib
MAP2K6	3VN9	118303686	-10.6		4-(2-(1-Fluoronaphthalen-2-yl)-5-(4-fluorophenyl)-1H-imidazol-4-yl)pyridine
MAP2K6	3VN9	135242184	-10.6		3-[2-Amino-6-[1-[[6-(2-hydroxypropan-2-yl)pyridin-2-yl]methyl]triazol-4-yl]pyrimidin-4-yl]-2-methylbenzonitrile
MAP2K6	3VN9	135565709	-10.6		Adavivint
MAP2K6	3VN9	138756246	-10.6		(3~{S})-3-[2-[[[1-[(1-methylimidazol-4-yl)methyl]indol-6-yl]methylamino]methyl]-1~{H}-indol-3-yl]-5-oxidanyl-2,3-dihydroisoindol-1-one
MAP2K6	3VN9	14140130	-10.6		Hydroprotopine
MAP2K6	3VN9	167691	-10.6		Peiminine
MAP2K6	3VN9	23649154	-10.6		Tegobuvir
MAP2K6	3VN9	24856041	-10.6		N-(4-(3-(2-aminopyrimidin-4-yl)pyridin-2-yloxy)phenyl)-4-(4-methylthiophen-2-yl)phthalazin-1-amine
MAP2K6	3VN9	400010	-10.6		Bardoxolone
MAP2K6	3VN9	53344908	-10.6		N-((4-(4-Phenylthiazol-2-yl)tetrahydro-2H-pyran-4-yl)methyl)-3-(5-(trifluoromethyl)-1,2,4-oxadiazol-3-yl)benzamide
MAP2K6	3VN9	60700	-10.6		Topotecan
MAP2K6	3VN9	60838	-10.6		Irinotecan
MAP2K6	3VN9	6450278	-10.6		Guggulsterone
MAP2K6	3VN9	10077130	-10.5		Vorapaxar
MAP2K6	3VN9	11273	-10.5		Formestane
MAP2K6	3VN9	11656518	-10.5		1-methyl-5-[2-[5-(trifluoromethyl)-1H-imidazol-2-yl]pyridin-4-yl]oxy-N-[4-(trifluoromethyl)phenyl]benzimidazol-2-amine
MAP2K6	3VN9	118888941	-10.5		4-(4-fluoro-3-((pyridin-2-ylmethyl)carbamoyl)phenyl)-N-(1H-indazol-5-yl)-6-methyl-2-oxo-1,2,3,4-tetrahydropyrimidine-5-carboxamide
MAP2K6	3VN9	118986699	-10.5		N2,N7-dicyclohexyl-9-(hydroxyimino)-9H-fluorene-2,7-disulfonamide
MAP2K6	3VN9	134521814	-10.5		(S)-6-(4-(5-(3,5-difluorophenyl)-4,5-dihydro-1H-pyrazole-1-carbonyl)piperidin-1-yl)pyrimidine-4-carbonitrile
MAP2K6	3VN9	137519541	-10.5		Bractoppin
MAP2K6	3VN9	154934526	-10.5		4'-(N-(1-(Cyclopropanecarbonyl)-1,2,3,4-tetrahydroquinolin-7-yl)sulfamoyl)-[1,1'-biphenyl]-3-carboxamide
MAP2K6	3VN9	164676	-10.5		Tanshinone IIA
MAP2K6	3VN9	24765037	-10.5		Pexmetinib
MAP2K6	3VN9	31703	-10.5		Doxorubicin
MAP2K6	3VN9	3467590	-10.5		7-Oxo-7h-Benzimidazo[2,1-A]benz[de]isoquinoline-3-Carboxylic Acid
MAP2K6	3VN9	44199317	-10.5		4-(4-fluoro-3-(4-methoxypiperidine-1-carbonyl)benzyl)phthalazin-1(2H)-one
MAP2K6	3VN9	442431	-10.5		Narirutin
MAP2K6	3VN9	5280601	-10.5		Luteolin 7-glucuronide
MAP2K6	3VN9	71766360	-10.5		4-(6-(4-(Morpholine-4-carbonyl)phenyl)imidazo[1,2-a]pyridin-3-yl)benzonitrile
MAP2K6	3VN9	90420193	-10.5		Ziritaxestat
MAP2K6	3VN9	9549298	-10.5		IKK Inhibitor VII
MAP2K6	3VN9	10008367	-10.4		N-(2-(((3S,4S)-1-(4-(Benzo[d][1,3]dioxol-5-yl)-4-hydroxycyclohexyl)-4-ethoxypyrrolidin-3-yl)amino)-2-oxoethyl)-3-(trifluoromethyl)benzamide
MAP2K6	3VN9	10366136	-10.4		Crenolanib
MAP2K6	3VN9	11188409	-10.4		Galeterone
MAP2K6	3VN9	117779453	-10.4		Pak4-IN-1
MAP2K6	3VN9	117955898	-10.4		Venadaparib
MAP2K6	3VN9	121256411	-10.4		2-phenyl-N-{5-[4-({5-[(phenylacetyl)amino]-1,3,4-thiadiazol-2-yl}amino)piperidin-1-yl]-1,3,4-thiadiazol-2-yl}acetamide
MAP2K6	3VN9	135409642	-10.4		Azilsartan medoxomil
MAP2K6	3VN9	135449332	-10.4		Eltrombopag
MAP2K6	3VN9	137379043	-10.4		Mezigdomide
MAP2K6	3VN9	16202218	-10.4		3-(2-Cyanopropan-2-yl)-N-(3-((7-methoxyquinazolin-4-yl)amino)-4-methylphenyl)benzamide
MAP2K6	3VN9	16678941	-10.4		Lumacaftor
MAP2K6	3VN9	17555704	-10.4		Smurf1-IN-A01
MAP2K6	3VN9	23626877	-10.4		3-(5-(4-(Cyclopentyloxy)-2-hydroxybenzoyl)-2-((3-hydroxybenzo[d]isoxazol-6-yl)methoxy)phenyl)propanoic acid
MAP2K6	3VN9	4075607	-10.4		4-[8-[(3,4-dimethylphenyl)sulfamoyl]-3a,4,5,9b-tetrahydro-3H-cyclopenta[c]quinolin-4-yl]benzoic acid
MAP2K6	3VN9	449097	-10.4		(3R)-1'-(9-anthrylcarbonyl)-3-(morpholin-4-ylcarbonyl)-1,4'-bipiperidine
MAP2K6	3VN9	4521392	-10.4		4-(4-(benzo[d][1,3]dioxol-5-yl)-5-(pyridin-2-yl)-1H-imidazol-2-yl)benzamide
MAP2K6	3VN9	46893585	-10.4		1-(4-(2-(4-(1-(3-(Trifluoromethyl)-7,8-dihydro-[1,2,4]triazolo[4,3-b]pyridazin-6-yl)piperidin-4-yl)phenoxy)ethyl)piperazin-1-yl)ethanone
MAP2K6	3VN9	49784002	-10.4		Nemiralisib
MAP2K6	3VN9	49792850	-10.4		Cyclopropanecarboxylic acid, 1-[4'-[3-methyl-4-[[[(1R)-1-phenylethoxy]carbonyl]amino]-5-isoxazolyl][1,1'-biphenyl]-4-yl]-
MAP2K6	3VN9	49843531	-10.4		2-[1-(4,4-Difluorocyclohexyl)-piperidin-4-yl]-6-fluoro-3-oxo-2,3-dihydro-1H-isoindole-4-carboxamide
MAP2K6	3VN9	5319484	-10.4		Apigenin 7-glucuronide
MAP2K6	3VN9	56846693	-10.4		Agerafenib
MAP2K6	3VN9	6070	-10.4		Veratramine
MAP2K6	3VN9	644241	-10.4		Nilotinib
MAP2K6	3VN9	654092	-10.4		2,7-bis(piperidin-1-ylsulfonyl)-9H-fluoren-9-one oxime
MAP2K6	3VN9	656583	-10.4		Trilostane
MAP2K6	3VN9	6917715	-10.4		Etonogestrel
MAP2K6	3VN9	70678419	-10.4		Bioymifi
MAP2K6	3VN9	71566751	-10.4		N-(6-(4-(2-((4-((4-Methylpiperazin-1-yl)methyl)-3-(trifluoromethyl)phenyl)amino)-2-oxoethyl)phenoxy)pyrimidin-4-yl)cyclopropanecarboxamide
MAP2K6	3VN9	83489	-10.4		Eriocitrin
MAP2K6	3VN9	86567195	-10.4		Fenebrutinib
MAP2K6	3VN9	90125978	-10.4		BTK inhibitor 27
MAP2K6	3VN9	10237	-10.3
MAP2K6	3VN9	10437018	-10.3
MAP2K6	3VN9	118224491	-10.3
MAP2K6	3VN9	11965427	-10.3
MAP2K6	3VN9	11982272	-10.3
MAP2K6	3VN9	124126348	-10.3
MAP2K6	3VN9	135398501	-10.3
MAP2K6	3VN9	137357450	-10.3
MAP2K6	3VN9	1471834	-10.3
MAP2K6	3VN9	160254	-10.3
MAP2K6	3VN9	21631106	-10.3
MAP2K6	3VN9	25154867	-10.3
MAP2K6	3VN9	31553	-10.3
MAP2K6	3VN9	442827	-10.3
MAP2K6	3VN9	44603362	-10.3
MAP2K6	3VN9	46926360	-10.3
MAP2K6	3VN9	49867926	-10.3
MAP2K6	3VN9	53469448	-10.3
MAP2K6	3VN9	73441802	-10.3
MAP2K6	3VN9	77461001	-10.3
MAP2K6	3VN9	86269224	-10.3
MAP2K6	3VN9	86582336	-10.3
MAP2K6	3VN9	10200813	-10.2
MAP2K6	3VN9	10478277	-10.2
MAP2K6	3VN9	11425923	-10.2
MAP2K6	3VN9	114917	-10.2
MAP2K6	3VN9	115237	-10.2
MAP2K6	3VN9	11556427	-10.2
MAP2K6	3VN9	117797905	-10.2
MAP2K6	3VN9	118191391	-10.2
MAP2K6	3VN9	11950170	-10.2
MAP2K6	3VN9	1287	-10.2
MAP2K6	3VN9	134611040	-10.2
MAP2K6	3VN9	135390910	-10.2
MAP2K6	3VN9	135397653	-10.2
MAP2K6	3VN9	137661516	-10.2
MAP2K6	3VN9	15953870	-10.2
MAP2K6	3VN9	16063245	-10.2
MAP2K6	3VN9	16623	-10.2
MAP2K6	3VN9	16747388	-10.2
MAP2K6	3VN9	199472	-10.2
MAP2K6	3VN9	213046	-10.2
MAP2K6	3VN9	21723007	-10.2
MAP2K6	3VN9	363709	-10.2
MAP2K6	3VN9	46209401	-10.2
MAP2K6	3VN9	46212391	-10.2
MAP2K6	3VN9	49779393	-10.2
MAP2K6	3VN9	49867930	-10.2
MAP2K6	3VN9	5213	-10.2
MAP2K6	3VN9	5281800	-10.2
MAP2K6	3VN9	5320686	-10.2
MAP2K6	3VN9	53464483	-10.2
MAP2K6	3VN9	54576299	-10.2
MAP2K6	3VN9	54764565	-10.2
MAP2K6	3VN9	57496611	-10.2
MAP2K6	3VN9	5870	-10.2
MAP2K6	3VN9	8550	-10.2
MAP2K6	3VN9	90116675	-10.2
MAP2K6	3VN9	90311989	-10.2
MAP2K6	3VN9	10029385	-10.1
MAP2K6	3VN9	11169063	-10.1
MAP2K6	3VN9	11683	-10.1
MAP2K6	3VN9	11753673	-10.1
MAP2K6	3VN9	118224238	-10.1
MAP2K6	3VN9	121301049	-10.1
MAP2K6	3VN9	122197584	-10.1
MAP2K6	3VN9	1285941	-10.1
MAP2K6	3VN9	130339268	-10.1
MAP2K6	3VN9	131900	-10.1
MAP2K6	3VN9	134817449	-10.1
MAP2K6	3VN9	16718576	-10.1
MAP2K6	3VN9	24180126	-10.1
MAP2K6	3VN9	24857323	-10.1
MAP2K6	3VN9	250948	-10.1
MAP2K6	3VN9	25257557	-10.1
MAP2K6	3VN9	442015	-10.1
MAP2K6	3VN9	443943	-10.1
MAP2K6	3VN9	44603533	-10.1
MAP2K6	3VN9	452548	-10.1
MAP2K6	3VN9	46208890	-10.1
MAP2K6	3VN9	46215815	-10.1
MAP2K6	3VN9	46927297	-10.1
MAP2K6	3VN9	5311345	-10.1
MAP2K6	3VN9	54580480	-10.1
MAP2K6	3VN9	57030	-10.1
MAP2K6	3VN9	57340686	-10.1
MAP2K6	3VN9	57654476	-10.1
MAP2K6	3VN9	68861	-10.1
MAP2K6	3VN9	6918448	-10.1
MAP2K6	3VN9	70688629	-10.1
MAP2K6	3VN9	71565985	-10.1
MAP2K6	3VN9	73400	-10.1
MAP2K6	3VN9	73425700	-10.1
MAP2K6	3VN9	78357763	-10.1
MAP2K6	3VN9	89655386	-10.1
MAP2K6	3VN9	9817839	-10.1
MAP2K6	3VN9	10026128	-10
MAP2K6	3VN9	11612883	-10
MAP2K6	3VN9	118023034	-10
MAP2K6	3VN9	118063735	-10
MAP2K6	3VN9	118323590	-10
MAP2K6	3VN9	118721244	-10
MAP2K6	3VN9	1307180	-10
MAP2K6	3VN9	135566652	-10
MAP2K6	3VN9	137628686	-10
MAP2K6	3VN9	13789	-10
MAP2K6	3VN9	138005721	-10
MAP2K6	3VN9	156422	-10
MAP2K6	3VN9	16004702	-10
MAP2K6	3VN9	16666333	-10
MAP2K6	3VN9	172997	-10
MAP2K6	3VN9	174157	-10
MAP2K6	3VN9	197810	-10
MAP2K6	3VN9	22245705	-10
MAP2K6	3VN9	24794416	-10
MAP2K6	3VN9	25108829	-10
MAP2K6	3VN9	25182616	-10
MAP2K6	3VN9	25195348	-10
MAP2K6	3VN9	2866412	-10
MAP2K6	3VN9	444022	-10
MAP2K6	3VN9	45256693	-10
MAP2K6	3VN9	5073	-10
MAP2K6	3VN9	51106	-10
MAP2K6	3VN9	5274591	-10
MAP2K6	3VN9	5279172	-10
MAP2K6	3VN9	5281647	-10
MAP2K6	3VN9	5284419	-10
MAP2K6	3VN9	5284587	-10
MAP2K6	3VN9	57339144	-10
MAP2K6	3VN9	57340666	-10
MAP2K6	3VN9	57662985	-10
MAP2K6	3VN9	60164	-10
MAP2K6	3VN9	60196195	-10
MAP2K6	3VN9	6238	-10
MAP2K6	3VN9	6279	-10
MAP2K6	3VN9	6450819	-10
MAP2K6	3VN9	6474310	-10
MAP2K6	3VN9	65752	-10
MAP2K6	3VN9	65999	-10
MAP2K6	3VN9	66548316	-10
MAP2K6	3VN9	67254	-10
MAP2K6	3VN9	67259771	-10
MAP2K6	3VN9	6852404	-10
MAP2K6	3VN9	70789348	-10
MAP2K6	3VN9	72202701	-10
MAP2K6	3VN9	72716071	-10
MAP2K6	3VN9	73309	-10
MAP2K6	3VN9	73388818	-10
MAP2K6	3VN9	78425817	-10
MAP2K6	3VN9	86298861	-10
MAP2K6	3VN9	90455046	-10
MAP2K6	3VN9	91667513	-10
MAP2K6	3VN9	9403	-10
MAP2K6	3VN9	9868037	-10
MAP2K6	3VN9	9893571	-10
MAP2K6	3VN9	10172943	-9.9
MAP2K6	3VN9	101964	-9.9
MAP2K6	3VN9	10621	-9.9
MAP2K6	3VN9	1103147	-9.9
MAP2K6	3VN9	11317439	-9.9
MAP2K6	3VN9	11827970	-9.9
MAP2K6	3VN9	118557502	-9.9
MAP2K6	3VN9	121333423	-9.9
MAP2K6	3VN9	129073603	-9.9
MAP2K6	3VN9	129269915	-9.9
MAP2K6	3VN9	130275856	-9.9
MAP2K6	3VN9	132180482	-9.9
MAP2K6	3VN9	135398510	-9.9
MAP2K6	3VN9	135659046	-9.9
MAP2K6	3VN9	138454798	-9.9
MAP2K6	3VN9	16727102	-9.9
MAP2K6	3VN9	189821	-9.9
MAP2K6	3VN9	1936439	-9.9
MAP2K6	3VN9	20916937	-9.9
MAP2K6	3VN9	2130404	-9.9
MAP2K6	3VN9	24771824	-9.9
MAP2K6	3VN9	25022668	-9.9
MAP2K6	3VN9	25066238	-9.9
MAP2K6	3VN9	25118925	-9.9
MAP2K6	3VN9	25141092	-9.9
MAP2K6	3VN9	25144319	-9.9
MAP2K6	3VN9	25145656	-9.9
MAP2K6	3VN9	25171648	-9.9
MAP2K6	3VN9	25229526	-9.9
MAP2K6	3VN9	2547533	-9.9
MAP2K6	3VN9	259846	-9.9
MAP2K6	3VN9	2826191	-9.9
MAP2K6	3VN9	2984337	-9.9
MAP2K6	3VN9	40973	-9.9
MAP2K6	3VN9	42628843	-9.9
MAP2K6	3VN9	44247727	-9.9
MAP2K6	3VN9	44631903	-9.9
MAP2K6	3VN9	4787937	-9.9
MAP2K6	3VN9	49831257	-9.9
MAP2K6	3VN9	5281600	-9.9
MAP2K6	3VN9	5281613	-9.9
MAP2K6	3VN9	540335	-9.9
MAP2K6	3VN9	54708532	-9.9
MAP2K6	3VN9	54713659	-9.9
MAP2K6	3VN9	5591	-9.9
MAP2K6	3VN9	56655374	-9.9
MAP2K6	3VN9	57331386	-9.9
MAP2K6	3VN9	57336812	-9.9
MAP2K6	3VN9	57340685	-9.9
MAP2K6	3VN9	58282870	-9.9
MAP2K6	3VN9	59599728	-9.9
MAP2K6	3VN9	6291	-9.9
MAP2K6	3VN9	6474309	-9.9
MAP2K6	3VN9	68570	-9.9
MAP2K6	3VN9	71621488	-9.9
MAP2K6	3VN9	71727668	-9.9
MAP2K6	3VN9	72710839	-9.9
MAP2K6	3VN9	73051434	-9.9
MAP2K6	3VN9	73599	-9.9
MAP2K6	3VN9	74223469	-9.9
MAP2K6	3VN9	75204377	-9.9
MAP2K6	3VN9	78357766	-9.9
MAP2K6	3VN9	86711931	-9.9
MAP2K6	3VN9	9848024	-9.9
MAP2K6	3VN9	9853053	-9.9
MAP2K6	3VN9	989521	-9.9
MAP2K6	3VN9	9934283	-9.9
MAP2K6	3VN9	10099206	-9.8
MAP2K6	3VN9	10113978	-9.8
MAP2K6	3VN9	10138260	-9.8
MAP2K6	3VN9	10322911	-9.8
MAP2K6	3VN9	10435235	-9.8
MAP2K6	3VN9	110694558	-9.8
MAP2K6	3VN9	11167602	-9.8
MAP2K6	3VN9	11282283	-9.8
MAP2K6	3VN9	11373846	-9.8
MAP2K6	3VN9	11454028	-9.8
MAP2K6	3VN9	11640390	-9.8
MAP2K6	3VN9	119307	-9.8
MAP2K6	3VN9	119373	-9.8
MAP2K6	3VN9	12000240	-9.8
MAP2K6	3VN9	12003241	-9.8
MAP2K6	3VN9	121269225	-9.8
MAP2K6	3VN9	122443390	-9.8
MAP2K6	3VN9	124085867	-9.8
MAP2K6	3VN9	129052025	-9.8
MAP2K6	3VN9	134128280	-9.8
MAP2K6	3VN9	135413536	-9.8
MAP2K6	3VN9	137701512	-9.8
MAP2K6	3VN9	137796782	-9.8
MAP2K6	3VN9	139600338	-9.8
MAP2K6	3VN9	162675169	-9.8
MAP2K6	3VN9	16760075	-9.8
MAP2K6	3VN9	168849	-9.8
MAP2K6	3VN9	196970	-9.8
MAP2K6	3VN9	24826799	-9.8
MAP2K6	3VN9	24958200	-9.8
MAP2K6	3VN9	25066467	-9.8
MAP2K6	3VN9	2703	-9.8
MAP2K6	3VN9	440707	-9.8
MAP2K6	3VN9	44462760	-9.8
MAP2K6	3VN9	44599207	-9.8
MAP2K6	3VN9	46213949	-9.8
MAP2K6	3VN9	46843772	-9.8
MAP2K6	3VN9	46908026	-9.8
MAP2K6	3VN9	471002	-9.8
MAP2K6	3VN9	48229	-9.8
MAP2K6	3VN9	49783923	-9.8
MAP2K6	3VN9	51001932	-9.8
MAP2K6	3VN9	5278396	-9.8
MAP2K6	3VN9	5281773	-9.8
MAP2K6	3VN9	5281780	-9.8
MAP2K6	3VN9	5281855	-9.8
MAP2K6	3VN9	5291	-9.8
MAP2K6	3VN9	53340664	-9.8
MAP2K6	3VN9	5494506	-9.8
MAP2K6	3VN9	5754	-9.8
MAP2K6	3VN9	5756	-9.8
MAP2K6	3VN9	5757	-9.8
MAP2K6	3VN9	58486178	-9.8
MAP2K6	3VN9	59174579	-9.8
MAP2K6	3VN9	5991	-9.8
MAP2K6	3VN9	5994	-9.8
MAP2K6	3VN9	60182388	-9.8
MAP2K6	3VN9	6230	-9.8
MAP2K6	3VN9	6480466	-9.8
MAP2K6	3VN9	68060125	-9.8
MAP2K6	3VN9	68234908	-9.8
MAP2K6	3VN9	6917864	-9.8
MAP2K6	3VN9	6918314	-9.8
MAP2K6	3VN9	6918774	-9.8
MAP2K6	3VN9	73442847	-9.8
MAP2K6	3VN9	77108121	-9.8
MAP2K6	3VN9	86280523	-9.8
MAP2K6	3VN9	86297077	-9.8
MAP2K6	3VN9	86345880	-9.8
MAP2K6	3VN9	90241742	-9.8
MAP2K6	3VN9	91668	-9.8
MAP2K6	3VN9	91801159	-9.8
MAP2K6	3VN9	92810	-9.8
MAP2K6	3VN9	9642	-9.8
MAP2K6	3VN9	9798973	-9.8
MAP2K6	3VN9	9806229	-9.8
MAP2K6	3VN9	9820008	-9.8
MAP2K6	3VN9	9927531	-9.8
MAP2K6	3VN9	99615	-9.8
MAP2K6	3VN9	10077207	-9.7
MAP2K6	3VN9	10195250	-9.7
MAP2K6	3VN9	10341154	-9.7
MAP2K6	3VN9	107905	-9.7
MAP2K6	3VN9	11168203	-9.7
MAP2K6	3VN9	11213558	-9.7
MAP2K6	3VN9	11233873	-9.7
MAP2K6	3VN9	11319217	-9.7
MAP2K6	3VN9	11494412	-9.7
MAP2K6	3VN9	11634725	-9.7
MAP2K6	3VN9	11671467	-9.7
MAP2K6	3VN9	11714353	-9.7
MAP2K6	3VN9	121328278	-9.7
MAP2K6	3VN9	130881	-9.7
MAP2K6	3VN9	131632978	-9.7
MAP2K6	3VN9	135565545	-9.7
MAP2K6	3VN9	137628635	-9.7
MAP2K6	3VN9	14539911	-9.7
MAP2K6	3VN9	148195	-9.7
MAP2K6	3VN9	155167581	-9.7
MAP2K6	3VN9	155207651	-9.7
MAP2K6	3VN9	15559100	-9.7
MAP2K6	3VN9	15951529	-9.7
MAP2K6	3VN9	16007367	-9.7
MAP2K6	3VN9	16020046	-9.7
MAP2K6	3VN9	16719221	-9.7
MAP2K6	3VN9	16720766	-9.7
MAP2K6	3VN9	176167	-9.7
MAP2K6	3VN9	185617	-9.7
MAP2K6	3VN9	2155128	-9.7
MAP2K6	3VN9	22024915	-9.7
MAP2K6	3VN9	2353	-9.7
MAP2K6	3VN9	23661666	-9.7
MAP2K6	3VN9	24756034	-9.7
MAP2K6	3VN9	24864553	-9.7
MAP2K6	3VN9	24884503	-9.7
MAP2K6	3VN9	25114442	-9.7
MAP2K6	3VN9	25134326	-9.7
MAP2K6	3VN9	25167777	-9.7
MAP2K6	3VN9	25227462	-9.7
MAP2K6	3VN9	3084131	-9.7
MAP2K6	3VN9	3084961	-9.7
MAP2K6	3VN9	3157	-9.7
MAP2K6	3VN9	3476	-9.7
MAP2K6	3VN9	3822	-9.7
MAP2K6	3VN9	3857348	-9.7
MAP2K6	3VN9	46213929	-9.7
MAP2K6	3VN9	4887	-9.7
MAP2K6	3VN9	49792852	-9.7
MAP2K6	3VN9	49870909	-9.7
MAP2K6	3VN9	509070	-9.7
MAP2K6	3VN9	51039119	-9.7
MAP2K6	3VN9	5280704	-9.7
MAP2K6	3VN9	5282150	-9.7
MAP2K6	3VN9	5284329	-9.7
MAP2K6	3VN9	5317025	-9.7
MAP2K6	3VN9	53388144	-9.7
MAP2K6	3VN9	53469059	-9.7
MAP2K6	3VN9	5405540	-9.7
MAP2K6	3VN9	54726191	-9.7
MAP2K6	3VN9	56960447	-9.7
MAP2K6	3VN9	57519544	-9.7
MAP2K6	3VN9	5753	-9.7
MAP2K6	3VN9	5857	-9.7
MAP2K6	3VN9	5892	-9.7
MAP2K6	3VN9	5952	-9.7
MAP2K6	3VN9	59634741	-9.7
MAP2K6	3VN9	636405	-9.7
MAP2K6	3VN9	65411	-9.7
MAP2K6	3VN9	65947	-9.7
MAP2K6	3VN9	6603904	-9.7
MAP2K6	3VN9	66414	-9.7
MAP2K6	3VN9	67377767	-9.7
MAP2K6	3VN9	6770	-9.7
MAP2K6	3VN9	67960134	-9.7
MAP2K6	3VN9	70686584	-9.7
MAP2K6	3VN9	71269142	-9.7
MAP2K6	3VN9	71601111	-9.7
MAP2K6	3VN9	72188643	-9.7
MAP2K6	3VN9	72307	-9.7
MAP2K6	3VN9	73427235	-9.7
MAP2K6	3VN9	73659	-9.7
MAP2K6	3VN9	73890923	-9.7
MAP2K6	3VN9	78320408	-9.7
MAP2K6	3VN9	90111638	-9.7
MAP2K6	3VN9	91438	-9.7
MAP2K6	3VN9	9926586	-9.7
MAP2K6	3VN9	9937291	-9.7
MAP2K6	3VN9	10453870	-9.6
MAP2K6	3VN9	11581936	-9.6
MAP2K6	3VN9	11597537	-9.6
MAP2K6	3VN9	118126601	-9.6
MAP2K6	3VN9	118224658	-9.6
MAP2K6	3VN9	118979674	-9.6
MAP2K6	3VN9	119041	-9.6
MAP2K6	3VN9	121271792	-9.6
MAP2K6	3VN9	121412508	-9.6
MAP2K6	3VN9	122668091	-9.6
MAP2K6	3VN9	124111565	-9.6
MAP2K6	3VN9	1241327	-9.6
MAP2K6	3VN9	12442765	-9.6
MAP2K6	3VN9	129626603	-9.6
MAP2K6	3VN9	129896912	-9.6
MAP2K6	3VN9	13109	-9.6
MAP2K6	3VN9	133053564	-9.6
MAP2K6	3VN9	133080719	-9.6
MAP2K6	3VN9	134828256	-9.6
MAP2K6	3VN9	135398492	-9.6
MAP2K6	3VN9	137796283	-9.6
MAP2K6	3VN9	13791	-9.6
MAP2K6	3VN9	138454765	-9.6
MAP2K6	3VN9	13943287	-9.6
MAP2K6	3VN9	146047148	-9.6
MAP2K6	3VN9	16038120	-9.6
MAP2K6	3VN9	16086114	-9.6
MAP2K6	3VN9	16362	-9.6
MAP2K6	3VN9	169511	-9.6
MAP2K6	3VN9	214348	-9.6
MAP2K6	3VN9	216239	-9.6
MAP2K6	3VN9	24152379	-9.6
MAP2K6	3VN9	24764449	-9.6
MAP2K6	3VN9	24788636	-9.6
MAP2K6	3VN9	24830385	-9.6
MAP2K6	3VN9	24858111	-9.6
MAP2K6	3VN9	24901704	-9.6
MAP2K6	3VN9	25102847	-9.6
MAP2K6	3VN9	25109292	-9.6
MAP2K6	3VN9	25161177	-9.6
MAP2K6	3VN9	25191001	-9.6
MAP2K6	3VN9	25204767	-9.6
MAP2K6	3VN9	3002977	-9.6
MAP2K6	3VN9	3151	-9.6
MAP2K6	3VN9	42598643	-9.6
MAP2K6	3VN9	44252884	-9.6
MAP2K6	3VN9	46220502	-9.6
MAP2K6	3VN9	4823	-9.6
MAP2K6	3VN9	4847	-9.6
MAP2K6	3VN9	49850262	-9.6
MAP2K6	3VN9	5281788	-9.6
MAP2K6	3VN9	5287541	-9.6
MAP2K6	3VN9	53322923	-9.6
MAP2K6	3VN9	53389629	-9.6
MAP2K6	3VN9	5342077	-9.6
MAP2K6	3VN9	5494425	-9.6
MAP2K6	3VN9	56599306	-9.6
MAP2K6	3VN9	56949517	-9.6
MAP2K6	3VN9	57363	-9.6
MAP2K6	3VN9	57382073	-9.6
MAP2K6	3VN9	57990869	-9.6
MAP2K6	3VN9	5832	-9.6
MAP2K6	3VN9	59657596	-9.6
MAP2K6	3VN9	60196635	-9.6
MAP2K6	3VN9	6337614	-9.6
MAP2K6	3VN9	6419753	-9.6
MAP2K6	3VN9	6441498	-9.6
MAP2K6	3VN9	6451149	-9.6
MAP2K6	3VN9	6476333	-9.6
MAP2K6	3VN9	6605258	-9.6
MAP2K6	3VN9	68873	-9.6
MAP2K6	3VN9	71554322	-9.6
MAP2K6	3VN9	72948694	-9.6
MAP2K6	3VN9	73349008	-9.6
MAP2K6	3VN9	74989	-9.6
MAP2K6	3VN9	78320750	-9.6
MAP2K6	3VN9	86271238	-9.6
MAP2K6	3VN9	90408826	-9.6
MAP2K6	3VN9	91663352	-9.6
MAP2K6	3VN9	91844684	-9.6
MAP2K6	3VN9	92158	-9.6
MAP2K6	3VN9	92786	-9.6
MAP2K6	3VN9	9549303	-9.6
MAP2K6	3VN9	10074640	-9.5
MAP2K6	3VN9	10407120	-9.5
MAP2K6	3VN9	1096292	-9.5
MAP2K6	3VN9	11154925	-9.5
MAP2K6	3VN9	11317348	-9.5
MAP2K6	3VN9	11387605	-9.5
MAP2K6	3VN9	11478363	-9.5
MAP2K6	3VN9	11598628	-9.5
MAP2K6	3VN9	11625818	-9.5
MAP2K6	3VN9	11713159	-9.5
MAP2K6	3VN9	117977934	-9.5
MAP2K6	3VN9	118434635	-9.5
MAP2K6	3VN9	118616775	-9.5
MAP2K6	3VN9	118628567	-9.5
MAP2K6	3VN9	118647211	-9.5
MAP2K6	3VN9	118933132	-9.5
MAP2K6	3VN9	11978813	-9.5
MAP2K6	3VN9	121280087	-9.5
MAP2K6	3VN9	121322599	-9.5
MAP2K6	3VN9	123879	-9.5
MAP2K6	3VN9	124052	-9.5
MAP2K6	3VN9	129053037	-9.5
MAP2K6	3VN9	129896932	-9.5
MAP2K6	3VN9	132585219	-9.5
MAP2K6	3VN9	134154594	-9.5
MAP2K6	3VN9	134691741	-9.5
MAP2K6	3VN9	135415867	-9.5
MAP2K6	3VN9	135565554	-9.5
MAP2K6	3VN9	135565981	-9.5
MAP2K6	3VN9	138319675	-9.5
MAP2K6	3VN9	138319686	-9.5
MAP2K6	3VN9	145925685	-9.5
MAP2K6	3VN9	146018837	-9.5
MAP2K6	3VN9	148163435	-9.5
MAP2K6	3VN9	15558620	-9.5
MAP2K6	3VN9	15983966	-9.5
MAP2K6	3VN9	16118392	-9.5
MAP2K6	3VN9	16124726	-9.5
MAP2K6	3VN9	16401639	-9.5
MAP2K6	3VN9	164517032	-9.5
MAP2K6	3VN9	177014	-9.5
MAP2K6	3VN9	181183	-9.5
MAP2K6	3VN9	19090	-9.5
MAP2K6	3VN9	216237	-9.5
MAP2K6	3VN9	21670038	-9.5
MAP2K6	3VN9	23625762	-9.5
MAP2K6	3VN9	247839	-9.5
MAP2K6	3VN9	24812758	-9.5
MAP2K6	3VN9	25021165	-9.5
MAP2K6	3VN9	25265312	-9.5
MAP2K6	3VN9	3191	-9.5
MAP2K6	3VN9	34781	-9.5
MAP2K6	3VN9	44155856	-9.5
MAP2K6	3VN9	46184986	-9.5
MAP2K6	3VN9	46190808	-9.5
MAP2K6	3VN9	46209133	-9.5
MAP2K6	3VN9	46834118	-9.5
MAP2K6	3VN9	46853593	-9.5
MAP2K6	3VN9	46911863	-9.5
MAP2K6	3VN9	49769085	-9.5
MAP2K6	3VN9	49843471	-9.5
MAP2K6	3VN9	5005498	-9.5
MAP2K6	3VN9	50922691	-9.5
MAP2K6	3VN9	51031035	-9.5
MAP2K6	3VN9	51039095	-9.5
MAP2K6	3VN9	5281542	-9.5
MAP2K6	3VN9	5311067	-9.5
MAP2K6	3VN9	5320313	-9.5
MAP2K6	3VN9	53262401	-9.5
MAP2K6	3VN9	5330286	-9.5
MAP2K6	3VN9	53357478	-9.5
MAP2K6	3VN9	5339	-9.5
MAP2K6	3VN9	54676038	-9.5
MAP2K6	3VN9	56963315	-9.5
MAP2K6	3VN9	5755	-9.5
MAP2K6	3VN9	58522530	-9.5
MAP2K6	3VN9	59397065	-9.5
MAP2K6	3VN9	6215	-9.5
MAP2K6	3VN9	62331	-9.5
MAP2K6	3VN9	6451164	-9.5
MAP2K6	3VN9	64982	-9.5
MAP2K6	3VN9	65015	-9.5
MAP2K6	3VN9	6540478	-9.5
MAP2K6	3VN9	6758	-9.5
MAP2K6	3VN9	68591	-9.5
MAP2K6	3VN9	71576419	-9.5
MAP2K6	3VN9	72326	-9.5
MAP2K6	3VN9	72550504	-9.5
MAP2K6	3VN9	7433743	-9.5
MAP2K6	3VN9	76282073	-9.5
MAP2K6	3VN9	78357764	-9.5
MAP2K6	3VN9	89455219	-9.5
MAP2K6	3VN9	90431752	-9.5
MAP2K6	3VN9	9051	-9.5
MAP2K6	3VN9	91754484	-9.5
MAP2K6	3VN9	91895359	-9.5
MAP2K6	3VN9	92802	-9.5
MAP2K6	3VN9	92997	-9.5
MAP2K6	3VN9	9821849	-9.5
MAP2K6	3VN9	9860529	-9.5
MAP2K6	3VN9	9865515	-9.5
MAP2K6	3VN9	9890209	-9.5
MAP2K6	3VN9	9931954	-9.5
MAP2K6	3VN9	10039361	-9.4
MAP2K6	3VN9	10158940	-9.4
MAP2K6	3VN9	10217	-9.4
MAP2K6	3VN9	10461815	-9.4
MAP2K6	3VN9	10631	-9.4
MAP2K6	3VN9	107985	-9.4
MAP2K6	3VN9	108052	-9.4
MAP2K6	3VN9	11326715	-9.4
MAP2K6	3VN9	11455910	-9.4
MAP2K6	3VN9	114776	-9.4
MAP2K6	3VN9	115149	-9.4
MAP2K6	3VN9	11610526	-9.4
MAP2K6	3VN9	11620908	-9.4
MAP2K6	3VN9	11677589	-9.4
MAP2K6	3VN9	11712649	-9.4
MAP2K6	3VN9	11750009	-9.4
MAP2K6	3VN9	117996795	-9.4
MAP2K6	3VN9	118878093	-9.4
MAP2K6	3VN9	118955396	-9.4
MAP2K6	3VN9	11953153	-9.4
MAP2K6	3VN9	11969542	-9.4
MAP2K6	3VN9	122707126	-9.4
MAP2K6	3VN9	12315075	-9.4
MAP2K6	3VN9	124173720	-9.4
MAP2K6	3VN9	12442762	-9.4
MAP2K6	3VN9	126481870	-9.4
MAP2K6	3VN9	134168328	-9.4
MAP2K6	3VN9	135398495	-9.4
MAP2K6	3VN9	135398737	-9.4
MAP2K6	3VN9	135444382	-9.4
MAP2K6	3VN9	135565181	-9.4
MAP2K6	3VN9	137003167	-9.4
MAP2K6	3VN9	1486608	-9.4
MAP2K6	3VN9	15604015	-9.4
MAP2K6	3VN9	156818030	-9.4
MAP2K6	3VN9	16124208	-9.4
MAP2K6	3VN9	16124688	-9.4
MAP2K6	3VN9	162365370	-9.4
MAP2K6	3VN9	162524593	-9.4
MAP2K6	3VN9	16723044	-9.4
MAP2K6	3VN9	173273	-9.4
MAP2K6	3VN9	176158	-9.4
MAP2K6	3VN9	179651	-9.4
MAP2K6	3VN9	197835	-9.4
MAP2K6	3VN9	23582824	-9.4
MAP2K6	3VN9	2375	-9.4
MAP2K6	3VN9	24794418	-9.4
MAP2K6	3VN9	24821094	-9.4
MAP2K6	3VN9	2818038	-9.4
MAP2K6	3VN9	30231	-9.4
MAP2K6	3VN9	3033818	-9.4
MAP2K6	3VN9	3033968	-9.4
MAP2K6	3VN9	33630	-9.4
MAP2K6	3VN9	3749	-9.4
MAP2K6	3VN9	42642648	-9.4
MAP2K6	3VN9	43507	-9.4
MAP2K6	3VN9	441383	-9.4
MAP2K6	3VN9	44187	-9.4
MAP2K6	3VN9	442428	-9.4
MAP2K6	3VN9	442985	-9.4
MAP2K6	3VN9	44467821	-9.4
MAP2K6	3VN9	44633765	-9.4
MAP2K6	3VN9	447077	-9.4
MAP2K6	3VN9	45279963	-9.4
MAP2K6	3VN9	46232606	-9.4
MAP2K6	3VN9	46885626	-9.4
MAP2K6	3VN9	4970	-9.4
MAP2K6	3VN9	49848070	-9.4
MAP2K6	3VN9	5284447	-9.4
MAP2K6	3VN9	5316097	-9.4
MAP2K6	3VN9	53245636	-9.4
MAP2K6	3VN9	54682876	-9.4
MAP2K6	3VN9	59472121	-9.4
MAP2K6	3VN9	59593294	-9.4
MAP2K6	3VN9	6410104	-9.4
MAP2K6	3VN9	6443484	-9.4
MAP2K6	3VN9	64971	-9.4
MAP2K6	3VN9	65064	-9.4
MAP2K6	3VN9	66555680	-9.4
MAP2K6	3VN9	68107965	-9.4
MAP2K6	3VN9	68827	-9.4
MAP2K6	3VN9	6918248	-9.4
MAP2K6	3VN9	71496742	-9.4
MAP2K6	3VN9	72950888	-9.4
MAP2K6	3VN9	73191	-9.4
MAP2K6	3VN9	76685059	-9.4
MAP2K6	3VN9	766949	-9.4
MAP2K6	3VN9	78357765	-9.4
MAP2K6	3VN9	82146	-9.4
MAP2K6	3VN9	86280646	-9.4
MAP2K6	3VN9	86723730	-9.4
MAP2K6	3VN9	8955	-9.4
MAP2K6	3VN9	91144	-9.4
MAP2K6	3VN9	9852086	-9.4
MAP2K6	3VN9	10041070	-9.3
MAP2K6	3VN9	10114	-9.3
MAP2K6	3VN9	10138980	-9.3
MAP2K6	3VN9	10223146	-9.3
MAP2K6	3VN9	10367662	-9.3
MAP2K6	3VN9	11213350	-9.3
MAP2K6	3VN9	11224574	-9.3
MAP2K6	3VN9	11256720	-9.3
MAP2K6	3VN9	11468733	-9.3
MAP2K6	3VN9	11511120	-9.3
MAP2K6	3VN9	118598754	-9.3
MAP2K6	3VN9	118621601	-9.3
MAP2K6	3VN9	11869417	-9.3
MAP2K6	3VN9	118958122	-9.3
MAP2K6	3VN9	118958833	-9.3
MAP2K6	3VN9	119034	-9.3
MAP2K6	3VN9	119258	-9.3
MAP2K6	3VN9	11998575	-9.3
MAP2K6	3VN9	121397587	-9.3
MAP2K6	3VN9	121487936	-9.3
MAP2K6	3VN9	124122366	-9.3
MAP2K6	3VN9	124123797	-9.3
MAP2K6	3VN9	132209614	-9.3
MAP2K6	3VN9	132212657	-9.3
MAP2K6	3VN9	132837	-9.3
MAP2K6	3VN9	135398516	-9.3
MAP2K6	3VN9	135535957	-9.3
MAP2K6	3VN9	135564570	-9.3
MAP2K6	3VN9	135837779	-9.3
MAP2K6	3VN9	13846689	-9.3
MAP2K6	3VN9	139350422	-9.3
MAP2K6	3VN9	139377763	-9.3
MAP2K6	3VN9	145945112	-9.3
MAP2K6	3VN9	15558616	-9.3
MAP2K6	3VN9	156526655	-9.3
MAP2K6	3VN9	159654	-9.3
MAP2K6	3VN9	15981237	-9.3
MAP2K6	3VN9	16218924	-9.3
MAP2K6	3VN9	16220172	-9.3
MAP2K6	3VN9	162641668	-9.3
MAP2K6	3VN9	16722832	-9.3
MAP2K6	3VN9	2011756	-9.3
MAP2K6	3VN9	2161	-9.3
MAP2K6	3VN9	23661638	-9.3
MAP2K6	3VN9	24739943	-9.3
MAP2K6	3VN9	24872560	-9.3
MAP2K6	3VN9	24905149	-9.3
MAP2K6	3VN9	24937012	-9.3
MAP2K6	3VN9	24996872	-9.3
MAP2K6	3VN9	25031915	-9.3
MAP2K6	3VN9	25062766	-9.3
MAP2K6	3VN9	25099184	-9.3
MAP2K6	3VN9	25134625	-9.3
MAP2K6	3VN9	25166913	-9.3
MAP2K6	3VN9	25230662	-9.3
MAP2K6	3VN9	2540	-9.3
MAP2K6	3VN9	265237	-9.3
MAP2K6	3VN9	2809273	-9.3
MAP2K6	3VN9	2827646	-9.3
MAP2K6	3VN9	3000469	-9.3
MAP2K6	3VN9	3062316	-9.3
MAP2K6	3VN9	3081361	-9.3
MAP2K6	3VN9	3136849	-9.3
MAP2K6	3VN9	3488	-9.3
MAP2K6	3VN9	3501	-9.3
MAP2K6	3VN9	3508054	-9.3
MAP2K6	3VN9	3663	-9.3
MAP2K6	3VN9	3820	-9.3
MAP2K6	3VN9	400169	-9.3
MAP2K6	3VN9	4058452	-9.3
MAP2K6	3VN9	442439	-9.3
MAP2K6	3VN9	44543605	-9.3
MAP2K6	3VN9	44608289	-9.3
MAP2K6	3VN9	4552	-9.3
MAP2K6	3VN9	46199646	-9.3
MAP2K6	3VN9	46224413	-9.3
MAP2K6	3VN9	46870258	-9.3
MAP2K6	3VN9	46871899	-9.3
MAP2K6	3VN9	49765871	-9.3
MAP2K6	3VN9	5035	-9.3
MAP2K6	3VN9	50905713	-9.3
MAP2K6	3VN9	5281406	-9.3
MAP2K6	3VN9	5281417	-9.3
MAP2K6	3VN9	5281718	-9.3
MAP2K6	3VN9	5281806	-9.3
MAP2K6	3VN9	52912222	-9.3
MAP2K6	3VN9	5311066	-9.3
MAP2K6	3VN9	5320053	-9.3
MAP2K6	3VN9	53258905	-9.3
MAP2K6	3VN9	5335621	-9.3
MAP2K6	3VN9	54671008	-9.3
MAP2K6	3VN9	54698642	-9.3
MAP2K6	3VN9	56649281	-9.3
MAP2K6	3VN9	56649450	-9.3
MAP2K6	3VN9	56928390	-9.3
MAP2K6	3VN9	5834	-9.3
MAP2K6	3VN9	59473233	-9.3
MAP2K6	3VN9	60160561	-9.3
MAP2K6	3VN9	60194102	-9.3
MAP2K6	3VN9	60198	-9.3
MAP2K6	3VN9	619002	-9.3
MAP2K6	3VN9	66571548	-9.3
MAP2K6	3VN9	66937006	-9.3
MAP2K6	3VN9	67202717	-9.3
MAP2K6	3VN9	67469084	-9.3
MAP2K6	3VN9	68165256	-9.3
MAP2K6	3VN9	68947304	-9.3
MAP2K6	3VN9	69964214	-9.3
MAP2K6	3VN9	71578106	-9.3
MAP2K6	3VN9	71748268	-9.3
MAP2K6	3VN9	72709209	-9.3
MAP2K6	3VN9	72734520	-9.3
MAP2K6	3VN9	73774610	-9.3
MAP2K6	3VN9	776123	-9.3
MAP2K6	3VN9	78357814	-9.3
MAP2K6	3VN9	86267612	-9.3
MAP2K6	3VN9	89884852	-9.3
MAP2K6	3VN9	90116945	-9.3
MAP2K6	3VN9	90331177	-9.3
MAP2K6	3VN9	91668541	-9.3
MAP2K6	3VN9	91826088	-9.3
MAP2K6	3VN9	91885617	-9.3
MAP2K6	3VN9	9438169	-9.3
MAP2K6	3VN9	94391	-9.3
MAP2K6	3VN9	9549299	-9.3
MAP2K6	3VN9	9808844	-9.3
MAP2K6	3VN9	9809542	-9.3
MAP2K6	3VN9	984333	-9.3
MAP2K6	3VN9	9852519	-9.3
MAP2K6	3VN9	9894584	-9.3
MAP2K6	3VN9	9956222	-9.3
MAP2K6	3VN9	9969021	-9.3
MAP2K6	3VN9	9974762	-9.3
MAP2K6	3VN9	100528	-9.2
MAP2K6	3VN9	10141893	-9.2
MAP2K6	3VN9	10173277	-9.2
MAP2K6	3VN9	101810	-9.2
MAP2K6	3VN9	10202642	-9.2
MAP2K6	3VN9	10253143	-9.2
MAP2K6	3VN9	10343454	-9.2
MAP2K6	3VN9	1067700	-9.2
MAP2K6	3VN9	11219835	-9.2
MAP2K6	3VN9	11524144	-9.2
MAP2K6	3VN9	11541511	-9.2
MAP2K6	3VN9	11705608	-9.2
MAP2K6	3VN9	118161062	-9.2
MAP2K6	3VN9	11876135	-9.2
MAP2K6	3VN9	11955855	-9.2
MAP2K6	3VN9	122705987	-9.2
MAP2K6	3VN9	122724	-9.2
MAP2K6	3VN9	126582741	-9.2
MAP2K6	3VN9	129045720	-9.2
MAP2K6	3VN9	132981	-9.2
MAP2K6	3VN9	134183206	-9.2
MAP2K6	3VN9	135151360	-9.2
MAP2K6	3VN9	135421442	-9.2
MAP2K6	3VN9	135440466	-9.2
MAP2K6	3VN9	135533054	-9.2
MAP2K6	3VN9	135905416	-9.2
MAP2K6	3VN9	138608764	-9.2
MAP2K6	3VN9	13991590	-9.2
MAP2K6	3VN9	14034912	-9.2
MAP2K6	3VN9	146195299	-9.2
MAP2K6	3VN9	148201	-9.2
MAP2K6	3VN9	154824631	-9.2
MAP2K6	3VN9	156414	-9.2
MAP2K6	3VN9	15985904	-9.2
MAP2K6	3VN9	16095342	-9.2
MAP2K6	3VN9	16225380	-9.2
MAP2K6	3VN9	162350	-9.2
MAP2K6	3VN9	16307093	-9.2
MAP2K6	3VN9	16490	-9.2
MAP2K6	3VN9	16734800	-9.2
MAP2K6	3VN9	16923	-9.2
MAP2K6	3VN9	169371	-9.2
MAP2K6	3VN9	176408	-9.2
MAP2K6	3VN9	17755052	-9.2
MAP2K6	3VN9	1794427	-9.2
MAP2K6	3VN9	1838043	-9.2
MAP2K6	3VN9	185460	-9.2
MAP2K6	3VN9	21763506	-9.2
MAP2K6	3VN9	22507438	-9.2
MAP2K6	3VN9	235905	-9.2
MAP2K6	3VN9	23635314	-9.2
MAP2K6	3VN9	2399	-9.2
MAP2K6	3VN9	24748573	-9.2
MAP2K6	3VN9	24771867	-9.2
MAP2K6	3VN9	24775005	-9.2
MAP2K6	3VN9	24906291	-9.2
MAP2K6	3VN9	25182860	-9.2
MAP2K6	3VN9	25254071	-9.2
MAP2K6	3VN9	26248	-9.2
MAP2K6	3VN9	3035850	-9.2
MAP2K6	3VN9	3038522	-9.2
MAP2K6	3VN9	3038525	-9.2
MAP2K6	3VN9	335974	-9.2
MAP2K6	3VN9	34040	-9.2
MAP2K6	3VN9	34458	-9.2
MAP2K6	3VN9	4008	-9.2
MAP2K6	3VN9	4331799	-9.2
MAP2K6	3VN9	44129660	-9.2
MAP2K6	3VN9	44137946	-9.2
MAP2K6	3VN9	44206063	-9.2
MAP2K6	3VN9	44259	-9.2
MAP2K6	3VN9	44607965	-9.2
MAP2K6	3VN9	44814423	-9.2
MAP2K6	3VN9	4712	-9.2
MAP2K6	3VN9	491941	-9.2
MAP2K6	3VN9	503737	-9.2
MAP2K6	3VN9	50878566	-9.2
MAP2K6	3VN9	50997747	-9.2
MAP2K6	3VN9	51349053	-9.2
MAP2K6	3VN9	521106	-9.2
MAP2K6	3VN9	5273567	-9.2
MAP2K6	3VN9	5280352	-9.2
MAP2K6	3VN9	5280804	-9.2
MAP2K6	3VN9	5281377	-9.2
MAP2K6	3VN9	5281672	-9.2
MAP2K6	3VN9	5281692	-9.2
MAP2K6	3VN9	5281810	-9.2
MAP2K6	3VN9	5281813	-9.2
MAP2K6	3VN9	5281888	-9.2
MAP2K6	3VN9	5282102	-9.2
MAP2K6	3VN9	5321398	-9.2
MAP2K6	3VN9	5351435	-9.2
MAP2K6	3VN9	5405	-9.2
MAP2K6	3VN9	54575456	-9.2
MAP2K6	3VN9	5488822	-9.2
MAP2K6	3VN9	56599293	-9.2
MAP2K6	3VN9	56847486	-9.2
MAP2K6	3VN9	56962337	-9.2
MAP2K6	3VN9	57336276	-9.2
MAP2K6	3VN9	57341148	-9.2
MAP2K6	3VN9	5734410	-9.2
MAP2K6	3VN9	57379345	-9.2
MAP2K6	3VN9	6440892	-9.2
MAP2K6	3VN9	6496840	-9.2
MAP2K6	3VN9	65866	-9.2
MAP2K6	3VN9	65948	-9.2
MAP2K6	3VN9	6918554	-9.2
MAP2K6	3VN9	70817911	-9.2
MAP2K6	3VN9	71481097	-9.2
MAP2K6	3VN9	71542096	-9.2
MAP2K6	3VN9	71584930	-9.2
MAP2K6	3VN9	71727581	-9.2
MAP2K6	3VN9	71768304	-9.2
MAP2K6	3VN9	72323	-9.2
MAP2K6	3VN9	72947731	-9.2
MAP2K6	3VN9	73412	-9.2
MAP2K6	3VN9	73602827	-9.2
MAP2K6	3VN9	75070350	-9.2
MAP2K6	3VN9	78161839	-9.2
MAP2K6	3VN9	78871801	-9.2
MAP2K6	3VN9	86720912	-9.2
MAP2K6	3VN9	91885558	-9.2
MAP2K6	3VN9	921541	-9.2
MAP2K6	3VN9	9552079	-9.2
MAP2K6	3VN9	9800555	-9.2
MAP2K6	3VN9	992293	-9.2
MAP2K6	3VN9	9933475	-9.2
MAP2K6	3VN9	9934347	-9.2
MAP2K6	3VN9	9934458	-9.2
MAP2K6	3VN9	9939609	-9.2
MAP2K6	3VN9	9952773	-9.2
MAP2K6	3VN9	9953065	-9.2
MAP2K6	3VN9	99693	-9.2
MAP2K6	3VN9	1029232	-9.1
MAP2K6	3VN9	10297043	-9.1
MAP2K6	3VN9	10481797	-9.1
MAP2K6	3VN9	10569	-9.1
MAP2K6	3VN9	107971	-9.1
MAP2K6	3VN9	11238147	-9.1
MAP2K6	3VN9	11327430	-9.1
MAP2K6	3VN9	11383075	-9.1
MAP2K6	3VN9	11409972	-9.1
MAP2K6	3VN9	11517980	-9.1
MAP2K6	3VN9	115196	-9.1
MAP2K6	3VN9	11524200	-9.1
MAP2K6	3VN9	115368	-9.1
MAP2K6	3VN9	11634093	-9.1
MAP2K6	3VN9	11667940	-9.1
MAP2K6	3VN9	11790	-9.1
MAP2K6	3VN9	118158953	-9.1
MAP2K6	3VN9	118169620	-9.1
MAP2K6	3VN9	121231412	-9.1
MAP2K6	3VN9	121241171	-9.1
MAP2K6	3VN9	12134997	-9.1
MAP2K6	3VN9	121364823	-9.1
MAP2K6	3VN9	121364961	-9.1
MAP2K6	3VN9	12136798	-9.1
MAP2K6	3VN9	121416213	-9.1
MAP2K6	3VN9	122424426	-9.1
MAP2K6	3VN9	124093	-9.1
MAP2K6	3VN9	124121703	-9.1
MAP2K6	3VN9	129101638	-9.1
MAP2K6	3VN9	129116690	-9.1
MAP2K6	3VN9	1328033	-9.1
MAP2K6	3VN9	134587348	-9.1
MAP2K6	3VN9	135297777	-9.1
MAP2K6	3VN9	135398658	-9.1
MAP2K6	3VN9	135445694	-9.1
MAP2K6	3VN9	135458654	-9.1
MAP2K6	3VN9	135565042	-9.1
MAP2K6	3VN9	1383884	-9.1
MAP2K6	3VN9	138471783	-9.1
MAP2K6	3VN9	14236566	-9.1
MAP2K6	3VN9	153241	-9.1
MAP2K6	3VN9	16042458	-9.1
MAP2K6	3VN9	161298	-9.1
MAP2K6	3VN9	161557	-9.1
MAP2K6	3VN9	16202152	-9.1
MAP2K6	3VN9	1893730	-9.1
MAP2K6	3VN9	208908	-9.1
MAP2K6	3VN9	214346	-9.1
MAP2K6	3VN9	2247	-9.1
MAP2K6	3VN9	2257249	-9.1
MAP2K6	3VN9	24768261	-9.1
MAP2K6	3VN9	24772860	-9.1
MAP2K6	3VN9	24776445	-9.1
MAP2K6	3VN9	24946690	-9.1
MAP2K6	3VN9	24986824	-9.1
MAP2K6	3VN9	25015677	-9.1
MAP2K6	3VN9	25151352	-9.1
MAP2K6	3VN9	25154041	-9.1
MAP2K6	3VN9	2541	-9.1
MAP2K6	3VN9	2726015	-9.1
MAP2K6	3VN9	2799764	-9.1
MAP2K6	3VN9	2836600	-9.1
MAP2K6	3VN9	3037565	-9.1
MAP2K6	3VN9	3091786	-9.1
MAP2K6	3VN9	3103157	-9.1
MAP2K6	3VN9	36462	-9.1
MAP2K6	3VN9	3973	-9.1
MAP2K6	3VN9	400769	-9.1
MAP2K6	3VN9	42611257	-9.1
MAP2K6	3VN9	439423	-9.1
MAP2K6	3VN9	44205240	-9.1
MAP2K6	3VN9	44241473	-9.1
MAP2K6	3VN9	442456	-9.1
MAP2K6	3VN9	442534	-9.1
MAP2K6	3VN9	442614	-9.1
MAP2K6	3VN9	44582816	-9.1
MAP2K6	3VN9	44607530	-9.1
MAP2K6	3VN9	44607531	-9.1
MAP2K6	3VN9	456201	-9.1
MAP2K6	3VN9	46184988	-9.1
MAP2K6	3VN9	46398810	-9.1
MAP2K6	3VN9	49806720	-9.1
MAP2K6	3VN9	50899324	-9.1
MAP2K6	3VN9	5186	-9.1
MAP2K6	3VN9	5280459	-9.1
MAP2K6	3VN9	5280805	-9.1
MAP2K6	3VN9	5281673	-9.1
MAP2K6	3VN9	5281807	-9.1
MAP2K6	3VN9	52936849	-9.1
MAP2K6	3VN9	5311510	-9.1
MAP2K6	3VN9	5318267	-9.1
MAP2K6	3VN9	54674461	-9.1
MAP2K6	3VN9	54758501	-9.1
MAP2K6	3VN9	5486199	-9.1
MAP2K6	3VN9	56644522	-9.1
MAP2K6	3VN9	56944705	-9.1
MAP2K6	3VN9	56962336	-9.1
MAP2K6	3VN9	57335384	-9.1
MAP2K6	3VN9	57345941	-9.1
MAP2K6	3VN9	57495353	-9.1
MAP2K6	3VN9	59232326	-9.1
MAP2K6	3VN9	60167648	-9.1
MAP2K6	3VN9	60464	-9.1
MAP2K6	3VN9	6604926	-9.1
MAP2K6	3VN9	6665	-9.1
MAP2K6	3VN9	68277611	-9.1
MAP2K6	3VN9	68911	-9.1
MAP2K6	3VN9	70798655	-9.1
MAP2K6	3VN9	70914230	-9.1
MAP2K6	3VN9	71268957	-9.1
MAP2K6	3VN9	71496458	-9.1
MAP2K6	3VN9	71736	-9.1
MAP2K6	3VN9	72201027	-9.1
MAP2K6	3VN9	72378	-9.1
MAP2K6	3VN9	72547959	-9.1
MAP2K6	3VN9	72551586	-9.1
MAP2K6	3VN9	73549	-9.1
MAP2K6	3VN9	78209992	-9.1
MAP2K6	3VN9	86291103	-9.1
MAP2K6	3VN9	89683805	-9.1
MAP2K6	3VN9	91623361	-9.1
MAP2K6	3VN9	91801204	-9.1
MAP2K6	3VN9	9549289	-9.1
MAP2K6	3VN9	9549297	-9.1
MAP2K6	3VN9	9890801	-9.1
MAP2K6	3VN9	9936746	-9.1
MAP2K6	3VN9	99640033	-9.1
MAP2K6	3VN9	10168	-9
MAP2K6	3VN9	10177784	-9
MAP2K6	3VN9	10182969	-9
MAP2K6	3VN9	10229237	-9
MAP2K6	3VN9	10302451	-9
MAP2K6	3VN9	10311306	-9
MAP2K6	3VN9	10668061	-9
MAP2K6	3VN9	107706	-9
MAP2K6	3VN9	108059	-9
MAP2K6	3VN9	11146840	-9
MAP2K6	3VN9	11234052	-9
MAP2K6	3VN9	112499905	-9
MAP2K6	3VN9	1138914	-9
MAP2K6	3VN9	1150897	-9
MAP2K6	3VN9	11618268	-9
MAP2K6	3VN9	11655079	-9
MAP2K6	3VN9	117881270	-9
MAP2K6	3VN9	118016229	-9
MAP2K6	3VN9	118107483	-9
MAP2K6	3VN9	119171	-9
MAP2K6	3VN9	119369	-9
MAP2K6	3VN9	11955716	-9
MAP2K6	3VN9	121499143	-9
MAP2K6	3VN9	122844	-9
MAP2K6	3VN9	124155204	-9
MAP2K6	3VN9	124246	-9
MAP2K6	3VN9	126689157	-9
MAP2K6	3VN9	132212900	-9
MAP2K6	3VN9	132214622	-9
MAP2K6	3VN9	132275066	-9
MAP2K6	3VN9	135423438	-9
MAP2K6	3VN9	135565884	-9
MAP2K6	3VN9	135743577	-9
MAP2K6	3VN9	136227923	-9
MAP2K6	3VN9	137322663	-9
MAP2K6	3VN9	137465182	-9
MAP2K6	3VN9	138911318	-9
MAP2K6	3VN9	14036811	-9
MAP2K6	3VN9	15478	-9
MAP2K6	3VN9	155011	-9
MAP2K6	3VN9	16048966	-9
MAP2K6	3VN9	16065491	-9
MAP2K6	3VN9	17754438	-9
MAP2K6	3VN9	185605	-9
MAP2K6	3VN9	187808	-9
MAP2K6	3VN9	2126	-9
MAP2K6	3VN9	2193203	-9
MAP2K6	3VN9	2248186	-9
MAP2K6	3VN9	23582846	-9
MAP2K6	3VN9	236702	-9
MAP2K6	3VN9	2455	-9
MAP2K6	3VN9	2467235	-9
MAP2K6	3VN9	24961094	-9
MAP2K6	3VN9	25073775	-9
MAP2K6	3VN9	25104564	-9
MAP2K6	3VN9	25126798	-9
MAP2K6	3VN9	25199517	-9
MAP2K6	3VN9	25227436	-9
MAP2K6	3VN9	2742550	-9
MAP2K6	3VN9	2946601	-9
MAP2K6	3VN9	3000518	-9
MAP2K6	3VN9	3036780	-9
MAP2K6	3VN9	3101542	-9
MAP2K6	3VN9	3168	-9
MAP2K6	3VN9	363209	-9
MAP2K6	3VN9	3948	-9
MAP2K6	3VN9	4369359	-9
MAP2K6	3VN9	44139710	-9
MAP2K6	3VN9	442009	-9
MAP2K6	3VN9	442088	-9
MAP2K6	3VN9	442813	-9
MAP2K6	3VN9	443055	-9
MAP2K6	3VN9	443955	-9
MAP2K6	3VN9	44516953	-9
MAP2K6	3VN9	44828492	-9
MAP2K6	3VN9	46216556	-9
MAP2K6	3VN9	46926973	-9
MAP2K6	3VN9	46940575	-9
MAP2K6	3VN9	49787172	-9
MAP2K6	3VN9	49852229	-9
MAP2K6	3VN9	5175738	-9
MAP2K6	3VN9	5280445	-9
MAP2K6	3VN9	5281078	-9
MAP2K6	3VN9	5281544	-9
MAP2K6	3VN9	5282337	-9
MAP2K6	3VN9	5282367	-9
MAP2K6	3VN9	5289418	-9
MAP2K6	3VN9	52938427	-9
MAP2K6	3VN9	5318767	-9
MAP2K6	3VN9	5327711	-9
MAP2K6	3VN9	54576693	-9
MAP2K6	3VN9	5488548	-9
MAP2K6	3VN9	5566	-9
MAP2K6	3VN9	5646	-9
MAP2K6	3VN9	56639723	-9
MAP2K6	3VN9	56642816	-9
MAP2K6	3VN9	56671814	-9
MAP2K6	3VN9	5717	-9
MAP2K6	3VN9	5730	-9
MAP2K6	3VN9	5738263	-9
MAP2K6	3VN9	5770	-9
MAP2K6	3VN9	57928403	-9
MAP2K6	3VN9	58118983	-9
MAP2K6	3VN9	58460047	-9
MAP2K6	3VN9	59447577	-9
MAP2K6	3VN9	6072	-9
MAP2K6	3VN9	637213	-9
MAP2K6	3VN9	6410758	-9
MAP2K6	3VN9	6420138	-9
MAP2K6	3VN9	6450551	-9
MAP2K6	3VN9	6451325	-9
MAP2K6	3VN9	6453452	-9
MAP2K6	3VN9	64945	-9
MAP2K6	3VN9	6604934	-9
MAP2K6	3VN9	66558287	-9
MAP2K6	3VN9	67335295	-9
MAP2K6	3VN9	67501411	-9
MAP2K6	3VN9	68019246	-9
MAP2K6	3VN9	68210102	-9
MAP2K6	3VN9	6878030	-9
MAP2K6	3VN9	6918852	-9
MAP2K6	3VN9	69496820	-9
MAP2K6	3VN9	70647728	-9
MAP2K6	3VN9	71226662	-9
MAP2K6	3VN9	71245288	-9
MAP2K6	3VN9	71360	-9
MAP2K6	3VN9	72199292	-9
MAP2K6	3VN9	72277	-9
MAP2K6	3VN9	72943187	-9
MAP2K6	3VN9	73062	-9
MAP2K6	3VN9	73386890	-9
MAP2K6	3VN9	73685	-9
MAP2K6	3VN9	78357788	-9
MAP2K6	3VN9	78427026	-9
MAP2K6	3VN9	85044918	-9
MAP2K6	3VN9	86279165	-9
MAP2K6	3VN9	86705695	-9
MAP2K6	3VN9	89542346	-9
MAP2K6	3VN9	89663273	-9
MAP2K6	3VN9	90157166	-9
MAP2K6	3VN9	90351311	-9
MAP2K6	3VN9	90456533	-9
MAP2K6	3VN9	91623360	-9
MAP2K6	3VN9	91691129	-9
MAP2K6	3VN9	91826086	-9
MAP2K6	3VN9	92722	-9
MAP2K6	3VN9	9549305	-9
MAP2K6	3VN9	9840076	-9
MAP2K6	3VN9	9844194	-9
MAP2K6	3VN9	9871419	-9
MAP2K6	3VN9	9880	-9
MAP2K6	3VN9	9915743	-9
MAP2K6	3VN9	9949641	-9
MAP2K6	3VN9	99514	-9
MAP2K6	3VN9	10096344	-8.9
MAP2K6	3VN9	10257882	-8.9
MAP2K6	3VN9	10316032	-8.9
MAP2K6	3VN9	10494	-8.9
MAP2K6	3VN9	10639	-8.9
MAP2K6	3VN9	108143	-8.9
MAP2K6	3VN9	10926754	-8.9
MAP2K6	3VN9	10972838	-8.9
MAP2K6	3VN9	11152667	-8.9
MAP2K6	3VN9	11210285	-8.9
MAP2K6	3VN9	11260561	-8.9
MAP2K6	3VN9	11427553	-8.9
MAP2K6	3VN9	11442891	-8.9
MAP2K6	3VN9	11462174	-8.9
MAP2K6	3VN9	11476171	-8.9
MAP2K6	3VN9	11664505	-8.9
MAP2K6	3VN9	11667893	-8.9
MAP2K6	3VN9	11707110	-8.9
MAP2K6	3VN9	11725801	-8.9
MAP2K6	3VN9	11749858	-8.9
MAP2K6	3VN9	117951478	-8.9
MAP2K6	3VN9	11983295	-8.9
MAP2K6	3VN9	121515	-8.9
MAP2K6	3VN9	12313704	-8.9
MAP2K6	3VN9	1235170	-8.9
MAP2K6	3VN9	124091011	-8.9
MAP2K6	3VN9	127030711	-8.9
MAP2K6	3VN9	127035871	-8.9
MAP2K6	3VN9	1324494	-8.9
MAP2K6	3VN9	134307820	-8.9
MAP2K6	3VN9	134436906	-8.9
MAP2K6	3VN9	134470179	-8.9
MAP2K6	3VN9	135394272	-8.9
MAP2K6	3VN9	135398521	-8.9
MAP2K6	3VN9	135403802	-8.9
MAP2K6	3VN9	135476586	-8.9
MAP2K6	3VN9	135564531	-8.9
MAP2K6	3VN9	135908617	-8.9
MAP2K6	3VN9	139600304	-8.9
MAP2K6	3VN9	155671000	-8.9
MAP2K6	3VN9	158845	-8.9
MAP2K6	3VN9	16216349	-8.9
MAP2K6	3VN9	16725047	-8.9
MAP2K6	3VN9	169870	-8.9
MAP2K6	3VN9	178024	-8.9
MAP2K6	3VN9	1791111	-8.9
MAP2K6	3VN9	196968	-8.9
MAP2K6	3VN9	216468	-8.9
MAP2K6	3VN9	2170	-8.9
MAP2K6	3VN9	229295	-8.9
MAP2K6	3VN9	2315	-8.9
MAP2K6	3VN9	23630211	-8.9
MAP2K6	3VN9	24721355	-8.9
MAP2K6	3VN9	24779724	-8.9
MAP2K6	3VN9	24780598	-8.9
MAP2K6	3VN9	24843124	-8.9
MAP2K6	3VN9	24889392	-8.9
MAP2K6	3VN9	24995524	-8.9
MAP2K6	3VN9	25113626	-8.9
MAP2K6	3VN9	25212148	-8.9
MAP2K6	3VN9	25227847	-8.9
MAP2K6	3VN9	25230468	-8.9
MAP2K6	3VN9	2882155	-8.9
MAP2K6	3VN9	2929	-8.9
MAP2K6	3VN9	2951910	-8.9
MAP2K6	3VN9	3034034	-8.9
MAP2K6	3VN9	3152990	-8.9
MAP2K6	3VN9	3478	-8.9
MAP2K6	3VN9	35397514	-8.9
MAP2K6	3VN9	3800971	-8.9
MAP2K6	3VN9	4405992	-8.9
MAP2K6	3VN9	440735	-8.9
MAP2K6	3VN9	44195571	-8.9
MAP2K6	3VN9	442126	-8.9
MAP2K6	3VN9	44252734	-8.9
MAP2K6	3VN9	442977	-8.9
MAP2K6	3VN9	443872	-8.9
MAP2K6	3VN9	443936	-8.9
MAP2K6	3VN9	44607360	-8.9
MAP2K6	3VN9	447912	-8.9
MAP2K6	3VN9	449193	-8.9
MAP2K6	3VN9	46848915	-8.9
MAP2K6	3VN9	4891	-8.9
MAP2K6	3VN9	49803313	-8.9
MAP2K6	3VN9	49806644	-8.9
MAP2K6	3VN9	49836058	-8.9
MAP2K6	3VN9	5154691	-8.9
MAP2K6	3VN9	5281222	-8.9
MAP2K6	3VN9	5281769	-8.9
MAP2K6	3VN9	5281793	-8.9
MAP2K6	3VN9	5282219	-8.9
MAP2K6	3VN9	5284566	-8.9
MAP2K6	3VN9	5287969	-8.9
MAP2K6	3VN9	5289501	-8.9
MAP2K6	3VN9	52936034	-8.9
MAP2K6	3VN9	5318214	-8.9
MAP2K6	3VN9	5329102	-8.9
MAP2K6	3VN9	5495818	-8.9
MAP2K6	3VN9	5720	-8.9
MAP2K6	3VN9	57390074	-8.9
MAP2K6	3VN9	57412684	-8.9
MAP2K6	3VN9	57504987	-8.9
MAP2K6	3VN9	59054177	-8.9
MAP2K6	3VN9	59422203	-8.9
MAP2K6	3VN9	5967294	-8.9
MAP2K6	3VN9	6436550	-8.9
MAP2K6	3VN9	6443665	-8.9
MAP2K6	3VN9	65048	-8.9
MAP2K6	3VN9	6610278	-8.9
MAP2K6	3VN9	6622273	-8.9
MAP2K6	3VN9	66598080	-8.9
MAP2K6	3VN9	67030	-8.9
MAP2K6	3VN9	67171867	-8.9
MAP2K6	3VN9	6741	-8.9
MAP2K6	3VN9	67979346	-8.9
MAP2K6	3VN9	702558	-8.9
MAP2K6	3VN9	70701426	-8.9
MAP2K6	3VN9	71570560	-8.9
MAP2K6	3VN9	71730058	-8.9
MAP2K6	3VN9	71768	-8.9
MAP2K6	3VN9	72165228	-8.9
MAP2K6	3VN9	72195175	-8.9
MAP2K6	3VN9	72200024	-8.9
MAP2K6	3VN9	9046	-8.9
MAP2K6	3VN9	91663303	-8.9
MAP2K6	3VN9	91670	-8.9
MAP2K6	3VN9	9415	-8.9
MAP2K6	3VN9	9661141	-8.9
MAP2K6	3VN9	9782	-8.9
MAP2K6	3VN9	9819086	-8.9
MAP2K6	3VN9	9825149	-8.9
MAP2K6	3VN9	9826308	-8.9
MAP2K6	3VN9	9836739	-8.9
MAP2K6	3VN9	9854489	-8.9
MAP2K6	3VN9	9907093	-8.9
MAP2K6	3VN9	9914412	-8.9
MAP2K6	3VN9	10177	-8.8
MAP2K6	3VN9	10184653	-8.8
MAP2K6	3VN9	10280735	-8.8
MAP2K6	3VN9	10337211	-8.8
MAP2K6	3VN9	11214940	-8.8
MAP2K6	3VN9	11304743	-8.8
MAP2K6	3VN9	11313622	-8.8
MAP2K6	3VN9	11351968	-8.8
MAP2K6	3VN9	11493598	-8.8
MAP2K6	3VN9	11501591	-8.8
MAP2K6	3VN9	11626560	-8.8
MAP2K6	3VN9	117072552	-8.8
MAP2K6	3VN9	118025540	-8.8
MAP2K6	3VN9	118036971	-8.8
MAP2K6	3VN9	118607832	-8.8
MAP2K6	3VN9	118796328	-8.8
MAP2K6	3VN9	119444	-8.8
MAP2K6	3VN9	121249291	-8.8
MAP2K6	3VN9	121268274	-8.8
MAP2K6	3VN9	12310288	-8.8
MAP2K6	3VN9	123132228	-8.8
MAP2K6	3VN9	127256226	-8.8
MAP2K6	3VN9	12796039	-8.8
MAP2K6	3VN9	12855920	-8.8
MAP2K6	3VN9	134814484	-8.8
MAP2K6	3VN9	135397654	-8.8
MAP2K6	3VN9	135398515	-8.8
MAP2K6	3VN9	135398520	-8.8
MAP2K6	3VN9	135565033	-8.8
MAP2K6	3VN9	146019721	-8.8
MAP2K6	3VN9	150311	-8.8
MAP2K6	3VN9	152946	-8.8
MAP2K6	3VN9	1554208	-8.8
MAP2K6	3VN9	156868176	-8.8
MAP2K6	3VN9	159516	-8.8
MAP2K6	3VN9	16007391	-8.8
MAP2K6	3VN9	16049404	-8.8
MAP2K6	3VN9	160644	-8.8
MAP2K6	3VN9	162163	-8.8
MAP2K6	3VN9	16760696	-8.8
MAP2K6	3VN9	17980288	-8.8
MAP2K6	3VN9	181567	-8.8
MAP2K6	3VN9	19009	-8.8
MAP2K6	3VN9	210332	-8.8
MAP2K6	3VN9	21672692	-8.8
MAP2K6	3VN9	22049997	-8.8
MAP2K6	3VN9	225609	-8.8
MAP2K6	3VN9	24753719	-8.8
MAP2K6	3VN9	24785538	-8.8
MAP2K6	3VN9	24795070	-8.8
MAP2K6	3VN9	25001557	-8.8
MAP2K6	3VN9	25015515	-8.8
MAP2K6	3VN9	25023738	-8.8
MAP2K6	3VN9	25113764	-8.8
MAP2K6	3VN9	25134521	-8.8
MAP2K6	3VN9	25260757	-8.8
MAP2K6	3VN9	2732	-8.8
MAP2K6	3VN9	2794	-8.8
MAP2K6	3VN9	2803797	-8.8
MAP2K6	3VN9	2910	-8.8
MAP2K6	3VN9	3033825	-8.8
MAP2K6	3VN9	3082856	-8.8
MAP2K6	3VN9	3083575	-8.8
MAP2K6	3VN9	310378	-8.8
MAP2K6	3VN9	3152	-8.8
MAP2K6	3VN9	3220	-8.8
MAP2K6	3VN9	3238952	-8.8
MAP2K6	3VN9	35802	-8.8
MAP2K6	3VN9	3718	-8.8
MAP2K6	3VN9	400772	-8.8
MAP2K6	3VN9	40326	-8.8
MAP2K6	3VN9	41774	-8.8
MAP2K6	3VN9	41781	-8.8
MAP2K6	3VN9	4261	-8.8
MAP2K6	3VN9	42642645	-8.8
MAP2K6	3VN9	439514	-8.8
MAP2K6	3VN9	44180156	-8.8
MAP2K6	3VN9	44240142	-8.8
MAP2K6	3VN9	443869	-8.8
MAP2K6	3VN9	44537963	-8.8
MAP2K6	3VN9	44577753	-8.8
MAP2K6	3VN9	456199	-8.8
MAP2K6	3VN9	46235922	-8.8
MAP2K6	3VN9	46785920	-8.8
MAP2K6	3VN9	46847888	-8.8
MAP2K6	3VN9	46909588	-8.8
MAP2K6	3VN9	4893	-8.8
MAP2K6	3VN9	4905675	-8.8
MAP2K6	3VN9	49830258	-8.8
MAP2K6	3VN9	49841217	-8.8
MAP2K6	3VN9	5042	-8.8
MAP2K6	3VN9	5081913	-8.8
MAP2K6	3VN9	50922675	-8.8
MAP2K6	3VN9	5280343	-8.8
MAP2K6	3VN9	5281004	-8.8
MAP2K6	3VN9	5281255	-8.8
MAP2K6	3VN9	5281612	-8.8
MAP2K6	3VN9	5281614	-8.8
MAP2K6	3VN9	5281764	-8.8
MAP2K6	3VN9	52913813	-8.8
MAP2K6	3VN9	52920501	-8.8
MAP2K6	3VN9	52934180	-8.8
MAP2K6	3VN9	5316606	-8.8
MAP2K6	3VN9	5321010	-8.8
MAP2K6	3VN9	5329099	-8.8
MAP2K6	3VN9	54577153	-8.8
MAP2K6	3VN9	54676228	-8.8
MAP2K6	3VN9	54685215	-8.8
MAP2K6	3VN9	5522952	-8.8
MAP2K6	3VN9	56640146	-8.8
MAP2K6	3VN9	56645576	-8.8
MAP2K6	3VN9	56941241	-8.8
MAP2K6	3VN9	56956240	-8.8
MAP2K6	3VN9	57345410	-8.8
MAP2K6	3VN9	57404276	-8.8
MAP2K6	3VN9	5745470	-8.8
MAP2K6	3VN9	57519748	-8.8
MAP2K6	3VN9	5877	-8.8
MAP2K6	3VN9	5895168	-8.8
MAP2K6	3VN9	60138149	-8.8
MAP2K6	3VN9	60795	-8.8
MAP2K6	3VN9	6293	-8.8
MAP2K6	3VN9	6325127	-8.8
MAP2K6	3VN9	6536806	-8.8
MAP2K6	3VN9	6538897	-8.8
MAP2K6	3VN9	656516	-8.8
MAP2K6	3VN9	66553218	-8.8
MAP2K6	3VN9	68208572	-8.8
MAP2K6	3VN9	6918485	-8.8
MAP2K6	3VN9	6918638	-8.8
MAP2K6	3VN9	6918837	-8.8
MAP2K6	3VN9	71285927	-8.8
MAP2K6	3VN9	71415	-8.8
MAP2K6	3VN9	71492799	-8.8
MAP2K6	3VN9	71521142	-8.8
MAP2K6	3VN9	71528744	-8.8
MAP2K6	3VN9	71561915	-8.8
MAP2K6	3VN9	71667668	-8.8
MAP2K6	3VN9	71748255	-8.8
MAP2K6	3VN9	72281	-8.8
MAP2K6	3VN9	73442743	-8.8
MAP2K6	3VN9	74767009	-8.8
MAP2K6	3VN9	781109	-8.8
MAP2K6	3VN9	78243717	-8.8
MAP2K6	3VN9	8515	-8.8
MAP2K6	3VN9	90448953	-8.8
MAP2K6	3VN9	90642938	-8.8
MAP2K6	3VN9	90718185	-8.8
MAP2K6	3VN9	91824786	-8.8
MAP2K6	3VN9	91933883	-8.8
MAP2K6	3VN9	91972002	-8.8
MAP2K6	3VN9	9797370	-8.8
MAP2K6	3VN9	9823820	-8.8
MAP2K6	3VN9	9823887	-8.8
MAP2K6	3VN9	9851101	-8.8
MAP2K6	3VN9	9864378	-8.8
MAP2K6	3VN9	9868551	-8.8
MAP2K6	3VN9	9869779	-8.8
MAP2K6	3VN9	9875401	-8.8
MAP2K6	3VN9	9878	-8.8
MAP2K6	3VN9	9881423	-8.8
MAP2K6	3VN9	9883029	-8.8
MAP2K6	3VN9	9912743	-8.8
MAP2K6	3VN9	10201696	-8.7
MAP2K6	3VN9	10207	-8.7
MAP2K6	3VN9	104741	-8.7
MAP2K6	3VN9	10574	-8.7
MAP2K6	3VN9	10794070	-8.7
MAP2K6	3VN9	1117196	-8.7
MAP2K6	3VN9	11201035	-8.7
MAP2K6	3VN9	11364421	-8.7
MAP2K6	3VN9	11476460	-8.7
MAP2K6	3VN9	114829	-8.7
MAP2K6	3VN9	11493841	-8.7
MAP2K6	3VN9	11504295	-8.7
MAP2K6	3VN9	11552706	-8.7
MAP2K6	3VN9	11561674	-8.7
MAP2K6	3VN9	11676373	-8.7
MAP2K6	3VN9	11689883	-8.7
MAP2K6	3VN9	118959080	-8.7
MAP2K6	3VN9	11949646	-8.7
MAP2K6	3VN9	121408882	-8.7
MAP2K6	3VN9	122198706	-8.7
MAP2K6	3VN9	122531750	-8.7
MAP2K6	3VN9	123964	-8.7
MAP2K6	3VN9	127019	-8.7
MAP2K6	3VN9	132519	-8.7
MAP2K6	3VN9	135413547	-8.7
MAP2K6	3VN9	135460621	-8.7
MAP2K6	3VN9	135566899	-8.7
MAP2K6	3VN9	135567128	-8.7
MAP2K6	3VN9	13606036	-8.7
MAP2K6	3VN9	136237316	-8.7
MAP2K6	3VN9	137333456	-8.7
MAP2K6	3VN9	137553174	-8.7
MAP2K6	3VN9	138611145	-8.7
MAP2K6	3VN9	14240934	-8.7
MAP2K6	3VN9	146635374	-8.7
MAP2K6	3VN9	1474853	-8.7
MAP2K6	3VN9	16041424	-8.7
MAP2K6	3VN9	161930	-8.7
MAP2K6	3VN9	169234	-8.7
MAP2K6	3VN9	176155	-8.7
MAP2K6	3VN9	176407	-8.7
MAP2K6	3VN9	177941	-8.7
MAP2K6	3VN9	1901244	-8.7
MAP2K6	3VN9	1915791	-8.7
MAP2K6	3VN9	214347	-8.7
MAP2K6	3VN9	2155264	-8.7
MAP2K6	3VN9	22347110	-8.7
MAP2K6	3VN9	2236	-8.7
MAP2K6	3VN9	24748204	-8.7
MAP2K6	3VN9	24756910	-8.7
MAP2K6	3VN9	24788740	-8.7
MAP2K6	3VN9	24941262	-8.7
MAP2K6	3VN9	24988881	-8.7
MAP2K6	3VN9	2799722	-8.7
MAP2K6	3VN9	2802462	-8.7
MAP2K6	3VN9	3082301	-8.7
MAP2K6	3VN9	31475	-8.7
MAP2K6	3VN9	3351	-8.7
MAP2K6	3VN9	3827663	-8.7
MAP2K6	3VN9	3885	-8.7
MAP2K6	3VN9	42574	-8.7
MAP2K6	3VN9	42627755	-8.7
MAP2K6	3VN9	42636535	-8.7
MAP2K6	3VN9	439246	-8.7
MAP2K6	3VN9	44219749	-8.7
MAP2K6	3VN9	444025	-8.7
MAP2K6	3VN9	44449392	-8.7
MAP2K6	3VN9	44631912	-8.7
MAP2K6	3VN9	44632017	-8.7
MAP2K6	3VN9	44968231	-8.7
MAP2K6	3VN9	452967	-8.7
MAP2K6	3VN9	46830365	-8.7
MAP2K6	3VN9	46934289	-8.7
MAP2K6	3VN9	487101	-8.7
MAP2K6	3VN9	5002	-8.7
MAP2K6	3VN9	5090	-8.7
MAP2K6	3VN9	509554	-8.7
MAP2K6	3VN9	51000408	-8.7
MAP2K6	3VN9	51031365	-8.7
MAP2K6	3VN9	5280443	-8.7
MAP2K6	3VN9	5280453	-8.7
MAP2K6	3VN9	5280633	-8.7
MAP2K6	3VN9	5280863	-8.7
MAP2K6	3VN9	5281040	-8.7
MAP2K6	3VN9	5281316	-8.7
MAP2K6	3VN9	5281617	-8.7
MAP2K6	3VN9	5281670	-8.7
MAP2K6	3VN9	5281680	-8.7
MAP2K6	3VN9	5287620	-8.7
MAP2K6	3VN9	5318083	-8.7
MAP2K6	3VN9	5318591	-8.7
MAP2K6	3VN9	5320227	-8.7
MAP2K6	3VN9	53232	-8.7
MAP2K6	3VN9	5329032	-8.7
MAP2K6	3VN9	5330790	-8.7
MAP2K6	3VN9	5352062	-8.7
MAP2K6	3VN9	5417	-8.7
MAP2K6	3VN9	54454	-8.7
MAP2K6	3VN9	54677946	-8.7
MAP2K6	3VN9	5469266	-8.7
MAP2K6	3VN9	5481663	-8.7
MAP2K6	3VN9	56973724	-8.7
MAP2K6	3VN9	5721207	-8.7
MAP2K6	3VN9	57664406	-8.7
MAP2K6	3VN9	58423153	-8.7
MAP2K6	3VN9	58525066	-8.7
MAP2K6	3VN9	59757974	-8.7
MAP2K6	3VN9	6018993	-8.7
MAP2K6	3VN9	6022	-8.7
MAP2K6	3VN9	60651	-8.7
MAP2K6	3VN9	60703	-8.7
MAP2K6	3VN9	638278	-8.7
MAP2K6	3VN9	6436246	-8.7
MAP2K6	3VN9	6444692	-8.7
MAP2K6	3VN9	6445562	-8.7
MAP2K6	3VN9	65084	-8.7
MAP2K6	3VN9	66571643	-8.7
MAP2K6	3VN9	6683	-8.7
MAP2K6	3VN9	67469117	-8.7
MAP2K6	3VN9	6776	-8.7
MAP2K6	3VN9	67983918	-8.7
MAP2K6	3VN9	68289010	-8.7
MAP2K6	3VN9	6918651	-8.7
MAP2K6	3VN9	6957673	-8.7
MAP2K6	3VN9	71299339	-8.7
MAP2K6	3VN9	71496460	-8.7
MAP2K6	3VN9	71509318	-8.7
MAP2K6	3VN9	71586631	-8.7
MAP2K6	3VN9	71657619	-8.7
MAP2K6	3VN9	71721540	-8.7
MAP2K6	3VN9	71765184	-8.7
MAP2K6	3VN9	72199293	-8.7
MAP2K6	3VN9	72301	-8.7
MAP2K6	3VN9	72551585	-8.7
MAP2K6	3VN9	72706840	-8.7
MAP2K6	3VN9	73051463	-8.7
MAP2K6	3VN9	73117	-8.7
MAP2K6	3VN9	73398	-8.7
MAP2K6	3VN9	73777259	-8.7
MAP2K6	3VN9	75593290	-8.7
MAP2K6	3VN9	76070959	-8.7
MAP2K6	3VN9	86677874	-8.7
MAP2K6	3VN9	90241673	-8.7
MAP2K6	3VN9	91666658	-8.7
MAP2K6	3VN9	91691130	-8.7
MAP2K6	3VN9	9566174	-8.7
MAP2K6	3VN9	9829395	-8.7
MAP2K6	3VN9	9848818	-8.7
MAP2K6	3VN9	9863827	-8.7
MAP2K6	3VN9	9865554	-8.7
MAP2K6	3VN9	9868426	-8.7
MAP2K6	3VN9	9869929	-8.7
MAP2K6	3VN9	9883705	-8.7
MAP2K6	3VN9	9883915	-8.7
MAP2K6	3VN9	9887712	-8.7
MAP2K6	3VN9	9911830	-8.7
MAP2K6	3VN9	9929425	-8.7
MAP2K6	3VN9	9950176	-8.7
MAP2K6	3VN9	9952928	-8.7
MAP2K6	3VN9	9996409	-8.7
MAP2K6	3VN9	101301	-8.6
MAP2K6	3VN9	10208	-8.6
MAP2K6	3VN9	1039737	-8.6
MAP2K6	3VN9	107641	-8.6
MAP2K6	3VN9	1088438	-8.6
MAP2K6	3VN9	11228693	-8.6
MAP2K6	3VN9	11314340	-8.6
MAP2K6	3VN9	11315474	-8.6
MAP2K6	3VN9	11381449	-8.6
MAP2K6	3VN9	115239	-8.6
MAP2K6	3VN9	11719003	-8.6
MAP2K6	3VN9	11844351	-8.6
MAP2K6	3VN9	118986645	-8.6
MAP2K6	3VN9	1213452	-8.6
MAP2K6	3VN9	12544	-8.6
MAP2K6	3VN9	134814488	-8.6
MAP2K6	3VN9	135400189	-8.6
MAP2K6	3VN9	135421339	-8.6
MAP2K6	3VN9	135445691	-8.6
MAP2K6	3VN9	135533619	-8.6
MAP2K6	3VN9	135565923	-8.6
MAP2K6	3VN9	135566764	-8.6
MAP2K6	3VN9	135735917	-8.6
MAP2K6	3VN9	137285011	-8.6
MAP2K6	3VN9	137319705	-8.6
MAP2K6	3VN9	13892722	-8.6
MAP2K6	3VN9	139467635	-8.6
MAP2K6	3VN9	14463159	-8.6
MAP2K6	3VN9	1464	-8.6
MAP2K6	3VN9	151170	-8.6
MAP2K6	3VN9	153506575	-8.6
MAP2K6	3VN9	15596617	-8.6
MAP2K6	3VN9	158781	-8.6
MAP2K6	3VN9	16016585	-8.6
MAP2K6	3VN9	160190	-8.6
MAP2K6	3VN9	16659841	-8.6
MAP2K6	3VN9	16741245	-8.6
MAP2K6	3VN9	176873	-8.6
MAP2K6	3VN9	1880	-8.6
MAP2K6	3VN9	193962	-8.6
MAP2K6	3VN9	21594228	-8.6
MAP2K6	3VN9	21599923	-8.6
MAP2K6	3VN9	23581869	-8.6
MAP2K6	3VN9	2415	-8.6
MAP2K6	3VN9	24180124	-8.6
MAP2K6	3VN9	24737642	-8.6
MAP2K6	3VN9	24766	-8.6
MAP2K6	3VN9	24868376	-8.6
MAP2K6	3VN9	24868421	-8.6
MAP2K6	3VN9	25127713	-8.6
MAP2K6	3VN9	25207689	-8.6
MAP2K6	3VN9	2581	-8.6
MAP2K6	3VN9	2733484	-8.6
MAP2K6	3VN9	2920302	-8.6
MAP2K6	3VN9	29987694	-8.6
MAP2K6	3VN9	31307	-8.6
MAP2K6	3VN9	3272524	-8.6
MAP2K6	3VN9	3352	-8.6
MAP2K6	3VN9	33613	-8.6
MAP2K6	3VN9	33919	-8.6
MAP2K6	3VN9	34312	-8.6
MAP2K6	3VN9	37750349	-8.6
MAP2K6	3VN9	3794	-8.6
MAP2K6	3VN9	3795	-8.6
MAP2K6	3VN9	387316	-8.6
MAP2K6	3VN9	39562	-8.6
MAP2K6	3VN9	42623951	-8.6
MAP2K6	3VN9	439533	-8.6
MAP2K6	3VN9	4410	-8.6
MAP2K6	3VN9	4418	-8.6
MAP2K6	3VN9	44181686	-8.6
MAP2K6	3VN9	44312236	-8.6
MAP2K6	3VN9	44472508	-8.6
MAP2K6	3VN9	45270144	-8.6
MAP2K6	3VN9	45375808	-8.6
MAP2K6	3VN9	4583	-8.6
MAP2K6	3VN9	46216796	-8.6
MAP2K6	3VN9	4659569	-8.6
MAP2K6	3VN9	46832368	-8.6
MAP2K6	3VN9	49846599	-8.6
MAP2K6	3VN9	51033720	-8.6
MAP2K6	3VN9	51042438	-8.6
MAP2K6	3VN9	51371303	-8.6
MAP2K6	3VN9	5280961	-8.6
MAP2K6	3VN9	5281107	-8.6
MAP2K6	3VN9	5281628	-8.6
MAP2K6	3VN9	5281697	-8.6
MAP2K6	3VN9	5282181	-8.6
MAP2K6	3VN9	5287792	-8.6
MAP2K6	3VN9	5288783	-8.6
MAP2K6	3VN9	5320521	-8.6
MAP2K6	3VN9	5326713	-8.6
MAP2K6	3VN9	5328940	-8.6
MAP2K6	3VN9	5329098	-8.6
MAP2K6	3VN9	53354764	-8.6
MAP2K6	3VN9	53378752	-8.6
MAP2K6	3VN9	5337997	-8.6
MAP2K6	3VN9	5379033	-8.6
MAP2K6	3VN9	5459840	-8.6
MAP2K6	3VN9	54767229	-8.6
MAP2K6	3VN9	5494449	-8.6
MAP2K6	3VN9	56650312	-8.6
MAP2K6	3VN9	58204997	-8.6
MAP2K6	3VN9	58298316	-8.6
MAP2K6	3VN9	58298318	-8.6
MAP2K6	3VN9	5957	-8.6
MAP2K6	3VN9	60167849	-8.6
MAP2K6	3VN9	637234	-8.6
MAP2K6	3VN9	64715	-8.6
MAP2K6	3VN9	676352	-8.6
MAP2K6	3VN9	6914657	-8.6
MAP2K6	3VN9	6917698	-8.6
MAP2K6	3VN9	71479709	-8.6
MAP2K6	3VN9	71621331	-8.6
MAP2K6	3VN9	71731823	-8.6
MAP2K6	3VN9	72320	-8.6
MAP2K6	3VN9	72696735	-8.6
MAP2K6	3VN9	73299	-8.6
MAP2K6	3VN9	73303	-8.6
MAP2K6	3VN9	74334923	-8.6
MAP2K6	3VN9	85542	-8.6
MAP2K6	3VN9	86296442	-8.6
MAP2K6	3VN9	86709174	-8.6
MAP2K6	3VN9	87517	-8.6
MAP2K6	3VN9	9549295	-8.6
MAP2K6	3VN9	9824562	-8.6
MAP2K6	3VN9	9841667	-8.6
MAP2K6	3VN9	9870652	-8.6
MAP2K6	3VN9	9884685	-8.6
MAP2K6	3VN9	9904854	-8.6
MAP2K6	3VN9	9910486	-8.6
MAP2K6	3VN9	9929127	-8.6
MAP2K6	3VN9	9949093	-8.6
MAP2K6	3VN9	100334	-8.5
MAP2K6	3VN9	1011240	-8.5
MAP2K6	3VN9	1013376	-8.5
MAP2K6	3VN9	10152654	-8.5
MAP2K6	3VN9	10215	-8.5
MAP2K6	3VN9	10331844	-8.5
MAP2K6	3VN9	10409068	-8.5
MAP2K6	3VN9	10688007	-8.5
MAP2K6	3VN9	11248490	-8.5
MAP2K6	3VN9	11249084	-8.5
MAP2K6	3VN9	11487078	-8.5
MAP2K6	3VN9	11488320	-8.5
MAP2K6	3VN9	11595431	-8.5
MAP2K6	3VN9	11609955	-8.5
MAP2K6	3VN9	11691484	-8.5
MAP2K6	3VN9	11754511	-8.5
MAP2K6	3VN9	117918742	-8.5
MAP2K6	3VN9	118129505	-8.5
MAP2K6	3VN9	118414016	-8.5
MAP2K6	3VN9	119584	-8.5
MAP2K6	3VN9	121232405	-8.5
MAP2K6	3VN9	12248889	-8.5
MAP2K6	3VN9	124219	-8.5
MAP2K6	3VN9	131801113	-8.5
MAP2K6	3VN9	131839646	-8.5
MAP2K6	3VN9	132010322	-8.5
MAP2K6	3VN9	132166923	-8.5
MAP2K6	3VN9	135398744	-8.5
MAP2K6	3VN9	135418940	-8.5
MAP2K6	3VN9	135421197	-8.5
MAP2K6	3VN9	135452901	-8.5
MAP2K6	3VN9	137278711	-8.5
MAP2K6	3VN9	137287575	-8.5
MAP2K6	3VN9	138696916	-8.5
MAP2K6	3VN9	139600320	-8.5
MAP2K6	3VN9	146674222	-8.5
MAP2K6	3VN9	149096	-8.5
MAP2K6	3VN9	1520267	-8.5
MAP2K6	3VN9	1548887	-8.5
MAP2K6	3VN9	155411202	-8.5
MAP2K6	3VN9	159325	-8.5
MAP2K6	3VN9	159999	-8.5
MAP2K6	3VN9	16038374	-8.5
MAP2K6	3VN9	160481	-8.5
MAP2K6	3VN9	16058637	-8.5
MAP2K6	3VN9	16220188	-8.5
MAP2K6	3VN9	16222096	-8.5
MAP2K6	3VN9	16725726	-8.5
MAP2K6	3VN9	16747683	-8.5
MAP2K6	3VN9	17751819	-8.5
MAP2K6	3VN9	193679	-8.5
MAP2K6	3VN9	214351	-8.5
MAP2K6	3VN9	2160	-8.5
MAP2K6	3VN9	2165	-8.5
MAP2K6	3VN9	21800	-8.5
MAP2K6	3VN9	23604942	-8.5
MAP2K6	3VN9	2378	-8.5
MAP2K6	3VN9	24894064	-8.5
MAP2K6	3VN9	24963252	-8.5
MAP2K6	3VN9	25015436	-8.5
MAP2K6	3VN9	25230266	-8.5
MAP2K6	3VN9	252682	-8.5
MAP2K6	3VN9	2554	-8.5
MAP2K6	3VN9	26133	-8.5
MAP2K6	3VN9	26305	-8.5
MAP2K6	3VN9	2734290	-8.5
MAP2K6	3VN9	2754	-8.5
MAP2K6	3VN9	3083590	-8.5
MAP2K6	3VN9	336423	-8.5
MAP2K6	3VN9	3702	-8.5
MAP2K6	3VN9	3841655	-8.5
MAP2K6	3VN9	4030	-8.5
MAP2K6	3VN9	4096211	-8.5
MAP2K6	3VN9	441336	-8.5
MAP2K6	3VN9	441401	-8.5
MAP2K6	3VN9	44143209	-8.5
MAP2K6	3VN9	44203948	-8.5
MAP2K6	3VN9	44250349	-8.5
MAP2K6	3VN9	44480399	-8.5
MAP2K6	3VN9	448202	-8.5
[truncated: 2,949 more rows]
