# Supplementary material for: Omilancor mitigates the senescence of nucleus pulposus cells induced by DDP through targeting MAP2K6
Source: Aging (Albany NY). 2024 Mar 20;16(6):5050–64. doi: 10.18632/aging.205588 (PMC11006466; doi:10.18632/aging.205588)
Supplement: Supplementary Table 2 [file aging-16-205588-s003.xlsx]

## Sheet: supplement 1
Supplementary Table 2. Information of drugs molecular docking screening.
	symbol	logFC	AveExpr	t	P.Value	adj.P.Val	B	threshold	#NAME?
1	MAP2K6	1.52356	3.54003	3.86365	0.0014268	0.16395	-0.890619	Up	2.84564
2	BRCA2	1.22999	5.68837	2.70612	0.0158058	0.235108	-2.97847	Up	1.80118
3	FBXO5	1.37378	5.7371	1.62256	0.124656	0.437909	-4.69388	No	0.904287
4	PLA2R1	1.06897	8.48611	1.90072	0.075923	0.363594	-4.29832	No	1.11963
5	ATM	0.988846	9.76643	3.34922	0.00418062	0.183728	-1.82605	No	2.37876
6	WNT16	0.925151	3.51284	2.08966	0.0533561	0.323625	-4.0087	No	1.27282
7	RBL1	0.832624	6.62858	3.32612	0.00438724	0.183728	-1.86804	No	2.35781
8	ATR	0.802305	7.78545	2.44134	0.0269263	0.265729	-3.43408	No	1.56982
9	SMC5	0.676776	9.28016	2.89233	0.0107967	0.220946	-2.64975	No	1.96671
10	MAPK10	0.673688	7.08015	1.88921	0.077543	0.366023	-4.31547	No	1.11046
11	MME	0.63512	9.89663	0.94742	0.357829	0.65222	-5.45425	No	0.446324
12	KAT6A	0.595646	8.17343	2.93144	0.0099609	0.214199	-2.58005	No	2.0017
13	CDK6	0.576793	9.43207	2.08934	0.053388	0.323625	-4.0092	No	1.27256
14	WRN	0.572896	7.76105	2.82332	0.012441	0.225558	-2.77222	No	1.90514
15	TP63	0.542537	2.25423	0.738116	0.471371	0.736027	-5.61941	No	0.326637
16	CITED2	0.50865	10.6322	1.87337	0.0798206	0.36788	-4.33894	No	1.09789
17	OPA1	0.437075	9.20516	2.42647	0.0277327	0.26665	-3.45915	No	1.55701
18	CHEK1	0.399873	6.86872	1.9948	0.0637867	0.343538	-4.15602	No	1.19527
19	PNPT1	0.376895	7.6529	1.64463	0.119985	0.431099	-4.66401	No	0.920872
20	SPI1	0.3668	3.27307	0.791813	0.44031	0.713268	-5.5806	No	0.356241
21	CDKN2B	0.354962	8.16168	1.00562	0.329898	0.630603	-5.40185	No	0.48162
22	PLK2	0.340549	7.96525	0.72595	0.478589	0.740977	-5.62785	No	0.320037
23	AKT3	0.279855	9.25315	0.784856	0.44426	0.716452	-5.58577	No	0.352363
24	KIR2DL4	0.254954	0.113313	1.14891	0.267856	0.582939	-5.26145	No	0.572098
25	NPM1	0.25373	11.9371	1.38641	0.185061	0.504064	-4.9954	No	0.732684
26	NEK4	0.235929	7.63013	2.95949	0.00940048	0.211158	-2.52991	No	2.02685
27	SIRT1	0.230813	8.3595	1.73993	0.1015	0.405525	-4.53188	No	0.993535
28	VASH1	0.222724	4.94028	0.685723	0.502922	0.754647	-5.65483	No	0.298499
29	IGF1R	0.217755	8.56705	1.16708	0.26066	0.577434	-5.24253	No	0.583926
30	CTC1	0.21528	5.57236	1.28944	0.215983	0.53541	-5.10882	No	0.665581
31	MORC3	0.206664	8.74946	0.651275	0.52432	0.76838	-5.67678	No	0.280403
32	SMC6	0.204934	8.20187	1.03066	0.318369	0.62149	-5.37847	No	0.497069
33	HMGA2	0.195096	8.66137	0.572201	0.575316	0.796706	-5.72312	No	0.240094
34	TP53	0.19299	6.69245	0.910457	0.376395	0.665499	-5.4861	No	0.424356
35	WNT1	0.187063	0.116025	0.880616	0.391852	0.676176	-5.51099	No	0.406878
36	NUAK1	0.162	6.80928	0.470694	0.644355	0.840727	-5.77418	No	0.190875
37	BMPR1A	0.161616	8.44864	0.586197	0.566105	0.79164	-5.71534	No	0.247103
38	SLC30A10	0.142485	1.05396	0.291062	0.774827	0.90588	-5.84072	No	0.110795
39	ZMPSTE24	0.131881	9.79206	0.427092	0.675132	0.856948	-5.79315	No	0.170612
40	TERF2	0.12214	7.04212	0.746543	0.46641	0.73277	-5.61348	No	0.331232
41	ARG2	0.112167	5.82842	0.394022	0.698883	0.869627	-5.80634	No	0.155595
42	HMGA1	0.0856278	7.47805	0.212102	0.834766	0.932496	-5.86016	No	0.0784355
43	MAP3K5	0.0483081	8.24801	0.172673	0.865122	0.947802	-5.8676	No	0.0629225
44	MAP2K7	0.0467488	5.22213	0.300281	0.767916	0.902252	-5.83806	No	0.114686
45	CDK2	0.0429869	6.76153	0.200349	0.843789	0.936896	-5.86254	No	0.0737662
46	NUP62	0.0368801	6.18989	0.176245	0.862363	0.946178	-5.86699	No	0.0643101
47	PRELP	0.0187982	7.42178	0.0433701	0.965955	0.990979	-5.88131	No	0.015043
48	MAPK8	-0.0157229	7.4969	-0.117036	0.908321	0.967285	-5.87551	No	0.0417607
49	RSL1D1	-0.0233252	9.53423	-0.251109	0.804998	0.919687	-5.85131	No	0.0942053
50	CHEK2	-0.0267489	6.33277	-0.183849	0.856493	0.944129	-5.86564	No	0.067276
51	CALR	-0.036374	11.3721	-0.227549	0.822944	0.927404	-5.85683	No	0.0846299
52	SIRT6	-0.0426136	4.83008	-0.216873	0.83111	0.930538	-5.85916	No	0.0803417
53	HLA-G	-0.0438922	2.35591	-0.0535158	0.957998	0.987568	-5.88083	No	0.0186353
54	DNAJA3	-0.0510326	6.64509	-0.468014	0.646228	0.841247	-5.7754	No	0.189614
55	ERCC1	-0.0591436	7.53271	-0.281362	0.78212	0.909311	-5.84344	No	0.106727
56	MAPK9	-0.0761419	7.7135	-0.543717	0.594299	0.808852	-5.73842	No	0.225995
57	MAP2K4	-0.0854666	7.88139	-0.700384	0.493971	0.749376	-5.64516	No	0.306298
58	KAT5	-0.0862052	6.37462	-0.559428	0.58379	0.802143	-5.73007	No	0.233743
59	NEK6	-0.107639	8.97539	-0.684086	0.503928	0.755186	-5.65589	No	0.297631
60	MAPKAPK5	-0.108905	7.23274	-0.872912	0.39591	0.679634	-5.51729	No	0.402403
61	BCL6	-0.113617	9.78487	-0.36987	0.716438	0.87749	-5.81532	No	0.144821
62	PTEN	-0.11753	10.424	-0.717911	0.483395	0.743364	-5.63335	No	0.315698
63	ZNF277	-0.130468	7.81841	-0.892071	0.385869	0.672018	-5.50152	No	0.41356
64	ABL1	-0.135868	8.19397	-0.803493	0.433728	0.708941	-5.57183	No	0.362783
65	ZMIZ1	-0.137365	9.63237	-0.626072	0.540295	0.777406	-5.69217	No	0.267369
66	NSMCE2	-0.14409	7.16138	-0.939759	0.361624	0.654344	-5.46095	No	0.441742
67	MAP2K3	-0.145716	6.95476	-0.326036	0.748717	0.893121	-5.83019	No	0.125682
68	PRMT6	-0.153723	7.11378	-0.730924	0.47563	0.738727	-5.62441	No	0.322731
69	CGAS	-0.173349	5.97739	-0.456862	0.654049	0.846177	-5.78039	No	0.18439
70	YPEL3	-0.177129	5.58508	-0.573257	0.574618	0.796392	-5.72254	No	0.24062
71	ABI3	-0.191184	2.34271	-0.561061	0.582703	0.801486	-5.72919	No	0.234553
72	PRKCD	-0.263312	6.68997	-0.694729	0.497413	0.751184	-5.64891	No	0.303283
73	MAP3K3	-0.276002	7.22023	-1.44887	0.16712	0.485332	-4.91904	No	0.776971
74	SRF	-0.298682	6.59441	-1.26749	0.223522	0.543283	-5.1336	No	0.65068
75	FZR1	-0.323153	5.56331	-1.22647	0.238159	0.55692	-5.17897	No	0.623132
76	ULK3	-0.329049	5.44928	-1.55334	0.140333	0.458345	-4.78578	No	0.852841
77	YBX1	-0.366543	11.2455	-1.37493	0.188524	0.506176	-5.00916	No	0.724634
78	MAPK11	-0.373975	3.86824	-0.73537	0.472995	0.736976	-5.62132	No	0.325144
79	TWIST1	-0.392027	6.99986	-0.882575	0.390825	0.67524	-5.50938	No	0.408018
80	MAPK14	-0.400037	9.20284	-1.90984	0.0746625	0.362837	-4.28471	No	1.1269
81	LMNA	-0.437075	10.2161	-1.30238	0.211633	0.530649	-5.09406	No	0.674417
82	CDKN1B	-0.438829	9.03242	-1.94959	0.0693817	0.353294	-4.2249	No	1.15875
83	PAWR	-0.446759	8.08931	-1.27756	0.220036	0.540006	-5.12227	No	0.657506
84	B2M	-0.494482	12.417	-1.49726	0.154227	0.473021	-4.85815	No	0.811841
85	MNT	-0.51428	6.86475	-1.97701	0.0659372	0.34651	-4.18323	No	1.18087
86	ID2	-0.548483	8.67005	-2.13572	0.0488763	0.315777	-3.93588	No	1.3109
87	HRAS	-0.579282	4.94031	-2.55637	0.0213961	0.251188	-3.23813	No	1.66966
88	PML	-0.591887	6.9833	-2.40297	0.0290543	0.268725	-3.49866	No	1.53679
89	TBX3	-0.592226	6.6835	-1.23077	0.236591	0.555691	-5.17427	No	0.626001
90	CDKN2A	-0.594888	5.3087	-3.19541	0.00576215	0.192898	-2.10515	No	2.23942
91	ING2	-0.651724	5.97665	-1.80095	0.0910156	0.388924	-4.44476	No	1.04088
92	MIF	-0.680239	3.92979	-2.11693	0.0506602	0.318872	-3.96568	No	1.29533
93	ZKSCAN3	-0.715326	6.48991	-2.36454	0.0313448	0.27544	-3.56293	No	1.50383
94	MAP2K1	-0.748875	8.51416	-3.28454	0.00478503	0.183728	-1.94355	No	2.32012
95	CDKN1A	-0.750501	9.46873	-2.4822	0.0248221	0.258719	-3.36485	No	1.60516
96	TBX2	-0.764747	4.67367	-0.983708	0.340227	0.639127	-5.4219	No	0.468231
97	ROMO1	-0.770829	5.14312	-2.17929	0.04496	0.306689	-3.86625	No	1.34717
98	EEF1E1	-0.798148	6.79952	-2.87677	0.0111478	0.221506	-2.67742	No	1.95281
99	SERPINE1	-1.35214	10.9907	-3.75884	0.00177564	0.165886	-1.08076	Down	2.75065
